# Supplementary material
Source: PubMed Central journal article supplement (PMC5988919)
Supplement: NIHMS931677-supplement-SI.pdf [file NIHMS931677-supplement-SI.pdf]

## ***Supporting Information***

# **Stereospecific Formation of Z-Trisubstituted Double Bonds by the Successive Action of Ketoreductase and Dehydratase Domains from *trans*-AT Polyketide Synthases**

*Xinqiang Xie\* and David E. Cane\**

Department of Chemistry, Box H, Brown University, Box H, Providence, Rhode Island

02912-9108, United States

\*To whom correspondence should be addressed:

woshixinqiang@126.com

david\_cane@brown.edu

## TABLE OF CONTENTS

|                                                                                                                            |         |
|----------------------------------------------------------------------------------------------------------------------------|---------|
| <b>Materials</b>                                                                                                           | S3      |
| <b>Methods</b>                                                                                                             | S3      |
| <b>Experimental Procedures</b>                                                                                             |         |
| General procedures for recombinant protein expression and purification                                                     | S9      |
| Assay of ketoreductase activity of BonKR2 and OxaDH5 with acyl-SNAC substrates <b>3</b> and <b>4</b>                       | S11     |
| Incubation of BonKR2 and OxaKR5 domains with acyl-SNAC substrates <b>3</b> and <b>4</b>                                    | S14     |
| Incubation of BonKR2 and OxaKR5 with (2 <i>R</i> )-2-methyl-3-ketopentanoyl-SEryACP6                                       | S19     |
| Incubation of BonKR2 and OxaKR5 with (2 <i>R</i> )-2-methyl-3-ketobutyryl- or pentanoyl-SBonACP2                           | S22     |
| GC-MS analysis methyl esters of BonKR2 and OxaKR5 reduction products                                                       | S22     |
| Incubation of BonDH2 and OxaDH5 with (2 <i>R</i> ,3 <i>S</i> )-2-methyl-3-hydroxybutyryl-BonACP2                           | S27     |
| DH-catalyzed hydration of (Z)-2-methyl-2-butenoyl-BonACP2                                                                  | S32     |
| <b>Supplementary Tables</b>                                                                                                |         |
| <b>Table S1.</b> Predicted MW and observed ESI-MS $M_D$ of KR and DH Domains                                               | S10     |
| <b>Table S2.</b> Steady-state kinetic parameters for KR-catalyzed reduction of ( $\pm$ )- <b>3</b> and ( $\pm$ )- <b>4</b> | S11     |
| <b>Table S3.</b> Stereochemistry of methyl 2-methyl-3-hydroxypentanoate produced by KR domains                             | S26     |
| <b>Table S4.</b> Stereochemistry of methyl 2-methyl-3-hydroxybutyrate produced by KR domains                               | S26     |
| <b>Table S5.</b> Predicted MW and observed ESI-MS MD of Acyl-BonACP2 derivatives.                                          | S33     |
| <b>Supplementary Figures</b>                                                                                               |         |
| <b>Figure S1.</b> BonKR2 amino acid sequence.                                                                              | S4      |
| <b>Figure S2.</b> BonDH2 amino acid sequence.                                                                              | S5      |
| <b>Figure S3.</b> Oxazolomycin PKS modules 3, 4 and 5 and module 3 domain boundaries.                                      | S6      |
| <b>Figure S4.</b> OxaKR5 and OxaDH5 amino acid sequences.                                                                  | S7-S8   |
| <b>Figure S5.</b> SDS-PAGE analysis of recombinant OxaKR5, OxaDH5, BonKR2 and BonDH2                                       | S10     |
| <b>Figure S6.</b> Assay of ketoreductase activity with ( $\pm$ )-2-methyl-3-ketopentanoyl-SNAC ( <b>4</b> )                | S12     |
| <b>Figure S7.</b> Assay of ketoreductase activity with ( $\pm$ )-2-methyl-3-ketobutanoyl-SNAC ( <b>3</b> )                 | S13     |
| <b>Figure S8.</b> GC-MS analysis of reduction of ( $\pm$ )-2-methyl-3-ketopentanoyl-SNAC ( <b>4</b> ) by BonKR2            | S15     |
| <b>Figure S9.</b> GC-MS analysis of reduction of ( $\pm$ )-2-methyl-3-ketopentanoyl-SNAC ( <b>4</b> ) by OxaKR5            | S16     |
| <b>Figure S10.</b> GC-MS analysis of reduction of ( $\pm$ )-2-methyl-3-ketobutyryl-SNAC ( <b>3</b> ) by BonKR2             | S17     |
| <b>Figure S11.</b> GC-MS analysis of reduction of ( $\pm$ )-2-methyl-3-ketobutyryl-SNAC ( <b>3</b> ) by OxaKR5             | S18     |
| <b>Figure S12.</b> GC-MS analysis of reduction of (2 <i>R</i> )-2-methyl-3-ketopentanoyl-EryACP6 with BonKR2               | S20     |
| <b>Figure S13.</b> GC-MS analysis of reduction of (2 <i>R</i> )-2-methyl-3-ketopentanoyl-EryACP6 with OxaKR5               | S21     |
| <b>Figure S14.</b> GC-MS analysis of reduction of (2 <i>R</i> )-2-methyl-3-ketopentanoyl-BonACP2 with BonKR2               | S24     |
| <b>Figure S15.</b> GC-MS analysis of reduction of (2 <i>R</i> )-2-methyl-3-ketobutyryl-BonACP2 with BonKR2                 | S24     |
| <b>Figure S16.</b> GC-MS analysis of reduction of (2 <i>R</i> )-2-methyl-3-ketobutyryl-BonACP2 with OxaKR5                 | S25     |
| <b>Figure S17.</b> GC-MS analysis of BonDH2-catalyzed dehydration                                                          | S28-S29 |
| <b>Figure S18.</b> GC-MS analysis of OxaDH5-catalyzed dehydration                                                          | S30-S31 |
| <b>Figure S19.</b> LC-MS analysis of DH-catalyzed hydration of 2-methyl-2-butenoyl-BonACP2 ( <b>16</b> )                   | S34-S36 |
| <b>Figure S20.</b> GC-MS analysis of BonDH2 and OxaDH5-catalyzed hydration of <b>16</b>                                    | S37     |
| <b>Figure S22.</b> Mega3.0 sequence alignment of DH domains                                                                | S38     |
| <b>References</b>                                                                                                          | S39     |

**Materials.** Ampicillin, carbenicillin, isopropylthio- $\beta$ -D-galactopyranoside (IPTG), and kanamycin were purchased from Thermo Scientific. All other chemical reagents were purchased from Sigma-Aldrich and utilized without further purification. Competent *E. coli* DH5-alpha, DH10-beta, and BL21(DE3) cloning and expression strains were purchased from New England Biolabs Inc (NEB). Restriction enzymes and T4 DNA ligase were purchased from NEB and used according to the manufacturer's specifications. Pre-charged 5 mL HisTrap FF columns were purchased from GE Healthcare Life Sciences. Amicon Ultra Centrifugal Filter Units (Amicon Ultra-15 and Amicon Ultra-4, 10K, 30K, 50K) were purchased from Millipore. Ery[KS6][AT6], EryACP6, PICS TE, and Sfp, were each expressed in *E. coli* BL21 (DE3) and purified using the previously described protocols.<sup>1-3</sup> The expression and purification of BonKS2, BonMT2, and BonACP2 have been previously described.<sup>4</sup> *E. coli* S-adenosylhomocysteine (SAH) nucleosidase (SAHase) were expressed and purified following the previously described protocols.<sup>5</sup> NigDH1 was expressed and purified as previously described.<sup>6</sup> The substrates ( $\pm$ )-2-methyl-3-ketobutanoic acid *N*-acetylcysteamine (SNAC) thioester (**3**) and ( $\pm$ )-2-methyl-3-ketopentanoyl-SNAC (**4**) were prepared as previously described.<sup>7</sup> Reference standards of methyl (2*R*,3*S*)-2-methyl-3-hydroxypentanoate (**8-Me**), methyl (2*S*,3*R*)-2-methyl-3-hydroxypentanoate, methyl (2*R*,3*R*)-2-methyl-3-hydroxypentanoate, and methyl (2*S*,3*S*)-2-methyl-3-hydroxypentanoate, prepared as previously described, were used as standards for chiral GC-MS analysis and for comparison with the corresponding 2-methyl-3-hydroxypentanoates.<sup>8</sup> A reference mixture of the four diastereomers of 2-methyl-3-hydroxybutanoic acid was purchased from VDM Biochemicals and converted to the corresponding methyl esters by treatment with TMSCHN<sub>2</sub> in methanol. Authentic methyl (2*S*,3*R*)-2-methyl-3-hydroxybutanoate (**7-Me**) was prepared by reduction of ( $\pm$ )-2-methyl-3-ketobutyryl-SNAC (**3**) with AmpKR2, the KR from module 2 of the amphotericin PKS, and NADPH, as previously described,<sup>7</sup> followed by hydrolysis and methylation with TMSCHN<sub>2</sub>. The configurations of each of the three remaining diastereomers of methyl 2-methyl-3-hydroxybutanoate were assigned based on their order of elution on chiral GC-MS and comparison with the elution order and known configuration of the corresponding methyl 2-methyl-3-hydroxypentanoates. The acetyl-SNAC and propionyl-SNAC were synthesized as previously described.<sup>7,8</sup> (*E*)-2-Methyl-2-butenic acid (tiglic acid) and (*Z*)-2-methyl-2-butenic acid (angelic acid) were purchased from TCI America.

**Methods.** General methods were as previously described.<sup>9</sup> All DNA manipulations were performed following standard procedures.<sup>9</sup> Growth media and conditions used for *E. coli* strains and standard methods for handling *E. coli* in vivo and in vitro were those described previously, unless otherwise noted.<sup>8,9</sup> Genes were synthesized by DNA 2.0 (ATUM), Newark, California or Genewiz, South Plainfield, NJ. All proteins were handled at 4 °C unless otherwise stated. Protein concentrations were determined according to the method of Bradford,<sup>10</sup> using a Tecan Infinite M200 Microplate Reader with bovine serum albumin as the standard. Protein purity and size were estimated using SDS-PAGE and visualized using Coomassie Blue stain and analyzed with a Bio-Rad ChemiDoc MP System. Protein accurate molecular weight was determined on an Agilent 6530 Accurate-Mass Q-TOF LC/MS. Kinetic assays of KR-catalyzed reactions were carried out using the Tecan Microplate Reader. Chiral GC-MS analysis was performed on an Agilent 5977A Series GC-MSD instrument, 70 eV EI in positive ion mode with a Varian CP-Chirasil-DEX CB capillary column (25 m  $\times$  0.25 mm) or a Hewlett-Packard Series II GC-MSD instrument, 70 eV EI in positive ion mode, using a Varian CP-Chirasil-DEX CB capillary column (25 m  $\times$  0.32 mm).

**Figure S1. BonKR2 amino acid sequence.** On the basis of the previously illustrated domain boundaries of Bon Module 2 from *Burkholderia gladioli* pv. *cocovenenans*,<sup>4</sup> the synthetic gene encoding BonKR2 domain was subcloned into the corresponding *NdeI* and *EcoRI*-digested pET-28a vector and the recombinant protein was expressed with an *N*-terminal His<sub>6</sub>-tag in *E. coli* BL21(DE3). Protein expression and purification procedures are described below.

PLGAPLAAGPLAPAAAAPRQTAPAASIATASLASAAVPRRQAGELMLAPIWEAVEETPSQAVA  
 GLPRTVWLGAETASLDRPAWVARLQAEGRLEQLVWQVPAGVARVALVGLRLIQALLELGYGA  
 QTLKLTVVTRQAQAVSPTETADPEQAGVHGLVGLSLAKSYPKWQVRLLDLPRDGELASLEWQR  
 VPADPRGDARAWRDGRWYRQRLAPCSLPAVEASRFRHGGVYVVLGGAGSIGAAFSEHLIRRY  
 RAQLVWLGRRPEDEAIRTQLSRLAALGPAPLYLSADATDRQALERARATILARFGTVHGIHV  
 SAVVLGEAPLAALDEAGFAEVLATKAITCEQMDAVFGGDALDFQLFFSSAQSFTKTPRLSHY  
 SAGCCHTDAYAHNLRNRPYAVRVMHWGYWGLAGDGAARFDQLMAQSGFAPIDPARGMEALEQ  
 LLAGPLGQLAFLSTTHGEGARAALGVSERETVQGLPSTPAVTLPERAEAAAPAGA

(N terminal *NdeI* site)

**CATATG**CCGCTGGGTGCACCGTTAGCCGCCGGTCCGTTAGCACCTGCAGCAGCACCGCGTCAG  
 ACAGCACCGGCAGCAAGCATTGCAACCGCAAGTCTGGCAAGCGCAGCCGTTCCCTCGCCGTC  
 AGCCGGTGAAGTGTGCTGGCCCCGATCTGGGAAGCAGTTGAAGAAACCCCGAGCCAAGCAG  
 TGGCCGGTTTACCGCGCACCGTTTGGCTGGGCGCCGAAACCGCAAGCTTAGATCGCCCCGCA  
 TGGGTGGCACGTTTACAGGCAGAGGGCCGTCTGGAACAACGGTGTGGCAGGTGCCGGCCGG  
 TGTTCACAGTGTTCATTAGTGGGCCTGCGCCTGATTCAGGCACTGCTGGAGCTGGGCTATG  
 GCGCACAGACCCCTGAAGCTGACCGTGGTTACCCGCCAGGCACAGGCCGTTAGCCCTACAGAG  
 ACCGCCGATCCGGAACAAGCAGGCGTGCATGGCCTGGTTGGTAGTCTGGCAAAGAGCTACCC  
 GAAATGGCAGGTGCGCCTGCTGGATCTGCCGCGTGATGGCGAACTGGCAAGTCTGGAATGGC  
 AACGCGTTCCTGCAGACCCGCGTGGTGATGCCCGCGCCTGGCGTGATGGTCGCTGGTATCGT  
 CAGCGCCTGGCCCCGTGTAGTTTACCGGCAGTGGAAAGCCAGCCGTTTTTCGCCATGGTGGCGT  
 GTATGTGGTTCTGGGTGGTGCCGGCAGCATTGGTGCCGCCCTTAGCGAGCATCTGATCCGTC  
 GTTATCGTGCACAGCTGGTGTGGCTGGGTGCGCCGCCGGAAGATGAAGCAATTCGCACACAG  
 CTGAGCCGCTGGCCGCATTAGGCCCGGCACCGCTGTACCTGAGTGCAGATGCCACCGATCG  
 CCAAGCATTAGAACGCGCACGTGCAACCATCCTGGCCCGTTTTGGCACAGTGCATGGCATTG  
 TTCACAGCGCCGTTGTGCTGGGTGAAGCACCGCTGGCCGCACTGGACGAAGCCGGTTTTGCC  
 GAGGTTCTGGCAACCAAAGCAATCACCTGCGAACAGATGGATGCCGTGTTGGTGGTGACGC  
 CCTGGACTTTTCAGCTGTTTTTCAGCAGCGCACAGAGTTTCACCAAGACCCCGCGCCTGAGCC  
 ACTATAGTGCCGGCTGCTGCCATACCGACGCCTATGCACATAACCTGCGCAATCGCCCTTAT  
 GCAGTTCGCGTGATGCATTGGGGCTATTGGGGTTTAGCCGGCGATGGTGCAGCACGCTTTGA  
 CCAGCTGATGGCACAGAGCGTTTTTGGCCCCGATTGATCCTGCCCGCGGCATGGAAGCACTGG  
 AACAGCTGCTGGCAGGCCCTCTGGGCCAGCTGGCCTTTCTGAGCACCACCCATGGTGAAGGT  
 GCACGTGCCGCCCTGGGCGTTAGCGAACGTGAGACCGTTCAGGGCCTGCCGAGTACCCCGGC  
 AGTGACCTTACCGAACGTGCCGAAGCAGCAGCACCGGCAGGTGCC**TGAATTC** (Stop codon

and C-terminal *EcoRI* site)

**Figure S2. BonDH2 amino acid sequence.** The synthetic gene encoding the BonDH2 domain from *Burkholderia gladioli* pv. *cococenanans* was subcloned into the corresponding *NdeI* and *EcoRI*-digested pET-28a vector and the recombinant protein was expressed with an *N*-terminal His<sub>6</sub>-tag in *E. coli* BL21 (DE3).

AAPRPAAAATAAARMPADAAGQLHPLVHRNVSTFGRQRYRTVLRGDEFFLRDHLVNGRRVVPGVAQLEWARAAVA  
DALADPAMTVRLEQVNWLRPLVAESALEVHVTLVPPQQGGRIRFEIHSGSGEHARAHSQGFVAVPPLAGRAQPPRV  
DLAAWRARAAQPTEVAARYAHFERVGLRYGPSFRVMDQLRVGADHALAMLRWPAEAPAEGYAWPPSVLDGALQAG  
LGLVARDGGLLELPFAMQAIEQWAPLPKNGISIVRRAADDSAAVRKLDVEIVDVDGRVAMRVSGFSTRPLGAPLAA  
GPLAPAAAAPRQT

(N terminal *NdeI* site)

CATATGGCCGCCCCGCGTCCGGCAGCAGCAGCAACAGCCGACGACGCATGCCGGCAGATGCAGCAGGTCAGCTG  
CATCCGCTGGTTTCATCGCAATGTGAGTACCTTTGGCCGTCAGCGCTATCGCACCCGTGCTGCGTGGCGATGAGTTC  
TTTCTGCGGACCATCTGGTGAATGGTCGTCGCGTGGTGCCTGGTGTGGCACAGCTGGAATGGGCCCGTGCAGCA  
GTTGCAGATGCCCTGGCCGATCCGGCAATGACCGTGCCTCTGGAGCAGGTGAACTGGCTGCGTCCGCTGGTGGCA  
GAAAGCGCACTGGAAGTTCATGTTACCCTGGTTCGCGCAGCAGGGCGGTTCGCATTCGCTTTGAGATTCATAGCGGC  
AGCGGCGAACATGCACGCGCCCATAGCCAGGGTTTTGCAGTTCGCGTTCGTTAGCCGGTTCGTGCACAGCCGCCT  
CGTGTTGATCTGGCCGCTGGCGTGCACGTGCAGCACAGCCTACCGAAGTGGCCGCCCGTTATGCCCATTTTCGAA  
CGTGTTGGCCTGCGTTATGGTCCGAGTTTTTCGCGTGATGGATCAGCTGCGCGTTGGTGCAGATCATGCCCTGGCA  
ATGCTGCGCTGGCCTGCAGAAGCACCGGCAGAAGGTTACGCCTGGCCGCCGAGTGTCTGGACGGTGCACCTGCAG  
GCCGGTCTGGGTTTAGTTGCCCGCATGGCCGGCTGGAAGTGCCTTTTGCATGCAGGCAATTGAGCAGTGGGCC  
CCGCTGCCGAAAAATGGCATTAGCATTGTGCGCCGTGCAGCAGACGATAGTGCCGCCGTGCGCAAACCTGGATGTG  
GAAATCGTGGATGTGGATGGCCGCGTGGCCATGCGTGTTAGCGGTTTTAGCACCCGTCTCTGGGTGCCCTTTA  
GCAGCCGGTCTTTAGCCCCGGCAGCAGCACCTCGCCAGACCTGAATTC (Stop codon and C-terminal *EcoRI*  
site)

## Domain boundaries and design of recombinant OxaDH5, OxaMT5 and OxaACP5

**Figure S3.** Oxazolomycin PKS modules 3, 4, and 5 and module 3 domain boundaries.

LOCUS ABS90475 4971 aa linear BCT  
 30-APR-2008  
 DEFINITION PKS [*Streptomyces albus*].  
 ACCESSION ABS90475  
 VERSION ABS90475.1 GI:155061085  
 DBSOURCE accession EF552687.1

1 MSSHDATDATDATDVSGNDIAIVGMAGRFPGADSVGEFWE LLRSGREGITRFSDEELAAA  
 (.....Oxazolomycin PKS module 3, 4.....)

3061 ADDDDI **I**AVIGIGGRYPHARDLTEFWENLRRGHDAVTEVPGDRWDADAHFDGDHTAPGSSY  
 3121 GKWGGFLEDVDAFDSLFFRIPPSQAKLMDPQERLFLEAAWSALENAGYPPSRLPRPRFGG  
 3181 QGRDVGVFAGVMWGDYAQLAAEESVRGNHHTVLTNRSIAIANQVSYFGDFRGPSVVVDTAC  
 3241 SASLVALHQACESVRRGECRYALAGGVNVAHPSKYAHL SRMRMLSTDGRCRSFGAGGDG  
 3301 YVPGEGVGAVLLKRLSEAVADGDHIHAVIKATAVNHGGRTSGYTVPSPPQAQQALIEETLD  
 3361 RAGIDPRTIGYVEAHGTGTALGDP **IEHTALQQAFAGVVRDAGAI**ALGSVKSNIHLEGAA **OxaKS5**  
 3421 GIAGLTKAVLQLSHGQLVPSLHSEETNPIIDFATSPFRVQRELADWARPVIETDGV **RVEQ**  
 3481 PRRASVSSFGAGGTNAHV **VLEEY**RAPEGSAATASGGHELLVLSARGPERL RAYAAEMAAH  
 3541 LRRERPALADTAHTLRVGREALPERLAFPAADIDDAADKFAAFADGASVPSAITGNADGH  
 3601 TALA EVFTDGAGPEFLRTLAAAGDDTRLARLWVSGAFAEWTA LHGRAAGRCRTVPL **PGYP**  
 3661 FERPRHWLPVTRTELADVPRPPGEKEARPEPPRAADR **TLTLD**PADPVVRDHVVGGRAVLP  
 3721 GVGHLDLVVRALGEDAARVFRDVRWLTPLVVPDTGAEV **TLTRPEAALTRPEAVGAARF**  
 3781 EDGPALGYRLTASSADASPVHSLGQVVATAPDRPAPLSVDLLKADCPRV **SHEELYEGLR**  
 3841 RRGLPYGPHFRRVAQAWTGDRTALARLHRPEECSDAARGPLDPGTLDAA **LHPLALLLADE OxaDH5**  
 3901 GASGRPLL **PFAADRVEIHAPLP**DEGW **SHVRDLG**SRRFDVTVTDAGGRVCVRVTGLALREA  
 3961 KPEPS **IDYRPRWAVAPP**AVADAVAPRAVLTVTGEEGAALADALREAH **PDAEHVRLSIGEG**  
 4021 GLDERATAELLDRVPHIDL **VYFLDVGGPHGPAADR**RARRAAQDRGTVALYRLV **RGLDRAG**  
 4081 LLDGPLALKVLT **TDALPLGDDDAVRPEAAGPI**GFCEVAAKEFPRLSAACLDVRREELGDG  
 4141 VRALVREPVR **AKVRPVSLRGGVRRIR**REAVAPAAAPTRFRERGVYLVIGGLV **LGRDTA**  
 4201 RYLARTYRARLV **VGRGAVDERRRADLAAIEEL**GAEVSYVPCDAGDPVALRQVIDETKDR **OxaKR5**  
 4261 FGALHGV **IHSAMVLVDKPIRR**LAEAE **LRTALDAKADTVW**SMFRALRGERPDFVLLYSSAV  
 4321 TFEGNHGQAGYAAGCHVADAWALAGARTAPY **PVRTVNWGYWHAAGD**THRESVLSRFAAAG  
 4381 IRPIGAEEGMAAVERVLSG **TLPQALVVKADQRI**LAGLVDTDTVLRAQPELPASSAPLAP  
 4441 GPGSTEPYTRSGGAA **ETETFARRLLV**GALRSMGVLRGPGERYTRDGLR **ARLGVVEAQER**  
 4501 LLGLLV **DVLLRGGHLRAEGPELVTTDL**VVDPEVLR **CVERP**EEAAAGLTARHPDAGAVTAL  
 4561 LLRCVEALPEVLT **GRRGHLDVLF**PGGSFDLVEAVYAGDPV **TRCNEQV**AGAVLRYVTERL  
 4621 RSRPGDRVRVLEVGAGTGGT **SARVLRALATA**GLGDHVEYLYTDVSEGFVRHGRKRFGAGH  
 4681 PFADFRALDI **ERVPEEQGFESGGY**DLVLSNVFHATGRIDRTLAHTKRL **LLGTNGVLVINE OxaMT5**  
 4741 GVELRDQMSLIFGLATGW **WLFEDA**EYRLPHSPLLSTTAWRDVLAHNGFRGVTEAPRPDGG  
 4801 THQCVLVAESDGFVPVTA **AAPGPPVPAASSAPAAV**STVPAGPDPVRDAERRV **KAVFARVL**  
 4861 EMEEDLLDARATFENY **GVDSL**VVLSLTKELEQEY **GPLPSTLL**FEHITIERLARHLAATGA **OxaACP5**  
 4921 AGTAAGTAAGPARAAE **PEAGIEQLVDSL**SDTEVDSL **LLRQLGSV**LQKQEEQR

**Figure S4. OxaKR5 amino acid sequence.** The synthetic gene encoding OxaKR5 domain was subcloned in the corresponding *NdeI* and *EcoRI*-digested pET-28a vector and the recombinant protein was expressed with an N-terminal His<sub>6</sub>-tag in *E. coli* BL21(DE3). Protein expression and purification procedures are described below.

IDYRPRWAVAPPVADAVAPRAVLTVTGEEGAALADALREAHHPDAEHVRLSIGEGGLDERATAELLDRVPHIDL  
YFLDVGGPHGPAADRRARRAAQDRGTVALYRLVRLDRAGLLDGPLALKVLTDDALPLGDDDAVRPEAAGPIGFC  
EVAAKEFPRLSAACLDVRREELGDGVRALVREPVRAKVRPVSLRGGVRRIRRLAIVAPAAAPTRFRERGVYLVIG  
GLGVLGRDARTYRLARTYRRLVLRGAVDERRRADLAAIEELGAEVSYVPCDAGDPVALRQVIDETKDRFGALH  
GVIHSAMVLVDKPIRRLAEAEELRTALDAKADTVWSMFRALRGERPDFVLLYSSAVTFEGNHGQAGYAAGCHVADA  
WALAGARTAPYPVRTVNWGYWHAAGDTHRESVLSRFAAAGIRPIGAEEGMAAVERVLSGTLPLQALVVKADQRILA  
GLGVDTDTVLRAQPELPASSAPLAPG

### (N terminal *NdeI* site)

CATATGATTGATTATAGACCACGTTGGGCCGTCGCACCGCCAGCCGTTGCAGATGCTGTCGCACCTCGTGCTGTT  
CTGACCGTCACGGGTGAAGAGGGTGCCGCGTTGGCGGACGCCCTGCGCGAGGCACATCCGGATGCTGAACATGTT  
CGCCTGTCTATTGGCGAGGGTGGCCTGGATGAGCGTGCGACCGCGGAACTGCTGGACCGTGTTCGCATATTGAC  
CTGGTGTACTTTCTGGATGTGGGTGGCCCGCACGGTCCGGCGCGGATCGTCTGTCGCGCCGTGCAGCACAGGAT  
CGTGGTACCGTTGCCCTGTACCGCCTGGTTCGTGGTCTGGACCGCGCGGGTCTGCTGGACCGTCCGCTGGCGTTG  
AAAGTCCTGACGACTGATGCTCTGCCGCTGGGCGATGACGATGCGGTGCGTCCAGAGCCGCGGGTCCGATCGGT  
TTCTGCGAAGTGGCAGCGAAAGAATTTCCGCGCCTGAGCGCAGCCTGTCTGGATGTGCGTCTGAAGAAC TGGGT  
GATGGTGTGCGCGCGTGGTGCCTGAACCGTTTCGTGCGAAAGTTCGTCCGGTGAGCCTGCGTGGCGGCGTTCGT  
CGTATTCGTCGTTTGAAGCGGTGGCGCCTGCAGCGGCTCCAACCCGTTTCGCGAGCGTGGCGTCTATCTGGTC  
ATTGGTGGCCTGGGCGTGCTGGGTGCTGACACCGCGGTTACCTGGCGCGCACCTATCGCGCGCGCCTGGTCCTG  
GTCGGTTCGCGGTGCTGTTGACGAGCGCCCGTGGGACCTGGCGGCCATCGAAGAACTGGGCGCTGAGGTGAGC  
TACGTCCCCTGCGATGCTGGCGATCCGGTGCCTTGCGTCAGGTTATCGACGAAACCAAAGACAGATTTGGTGCC  
TTACACGGTGTATTTCATTCGGCGATGGTCTGGTGGATAAGCCGATCCGTCGCTTGGCAGAGGCAGAGCTGCGT  
ACCGCTCTGGACCGCAAAGCAGACACGGTGTGGAGCATGTTCCGTGCGCTGCGTGGTGGAGCGCCCGGATTTCTGT  
CTGTTGTACAGCAGCGAGTGACCTTCGAGGGTAATCACGGTCAGGCTGGTTACGCCGCGGGTTGCCATGTTGCC  
GATGCGTGGGCATTAGCGGGCGCCGTACCGCACCGTATCCGGTCCGTACTGTCAACTGGGGCTACTGGCACGCT  
GCCGGCGATACGCACCGTGAGTCTGTTCTGTCCCCTTCGCGGGCCGCGGGCATCCGTCCGATCGGTGCGGAAGAG  
GGCATGGCAGCGGTGGAGCGTGTGCTGAGCGGCACCCTGCCGCAAGCGCTGGTTGTTAAAGCAGACCAACGCATT  
CTGGCTGGTTTGGGTGTTGATACGGATACCGTATTGCGTGCGCAGCCTGAACTTCGCGGAGCAGCGCACCGCTG  
GCTCCGGGTTGAATTC (Stop codon and C-terminal *EcoRI* site)

**OxaDH5 amino acid sequence.** The synthetic gene encoding OxaDH5 domain was subcloned in the corresponding *NdeI* and *EcoRI* digested pET-28a vector and the recombinant protein was expressed with N-terminal His6-tag in *E.coli* BL21 (DE3).

LPGYPFERPRHWLPVTRTELADVPRPPGEKEARPEPPRAADRITLTLDPADPVVRDHVVGRAVLPGVGHLDLVVR  
ALGEDAARVFRDVRWLTPLVVPDTGAEVTLTTRPEAALTTRPEAVGAARPEDGPALGYRLTASSADASPVHSLGQ  
VVATAPDRPAPLSVDLLKADCPRRVSHEELYEGLRRRGLPYGPHFRRVAQAWTGDRTALARLHRPEECSDAARGP  
LDPGTLDAALHPLALLLADEGASGRPLLPFAADRVEIHAPLPDEGWSHVRDLGSRRFDVTVTDAGGRVCVRVTGL  
ALREAKPEPSID

(N terminal *NdeI* site)

**CATATG**CTGCCGGGCTATCCGTTTGAACGTCCGCGCCATTGGCTGCCTGTGACCCGTACCGAACTGGCCGATGTT  
CCGCGTCCCGGGGTGAGAAAAGAACCCCGTCTTGAACCTCCGCGTGCCGCAGATCGTACCCTGACACTGGATCCG  
GCAGATCCTGTTGTTTCGCGATCATGTTGTGGGTGGTCGTGCCGTTCTGCCGGGTGTGGGTCATCTGGATCTGGTG  
GTTTCGCGCACTGGGTGAAGATGCAGCCCGCGTGTTCGCGATGTGCGTTGGCTGACACCGCTGGTTGTTCCGGAT  
ACCGGCGCAGAAGTGACCCTGACAACACGTCCGGAAGCAGCACTGACAACCCGCCCCGGAAGCCGTTGGTGCCGCA  
CGTCCTGAAGATGGCCCCGCACTGGGTTATCGCCTGACAGCAAGCAGCGCCGATGCAAGCCCGGTTTCATAGCCTG  
GGTCAGGTGGTTGCAACAGCCCCGGATCGTCCGGCACCGCTGAGCGTTGACCTGCTGAAAGCCGATTGCCCTCGC  
CGCGTTAGCCATGAAGAACTGTATGAGGGCCTGCGTCGTCGCGGTCTGCCGTATGGTCCTCATTTCGTCGCGTT  
GCACAGGCATGGACCGGTGATCGTACCGCCCTGGCACGTCTGCATCGTCCGGAAGAATGCAGCGATGCAGCACGT  
GGTCCGCTGGATCCTGGCACACTGGATGCAGCCCTGCATCCGCTGGCACTGCTGCTGGCCGATGAAGGCGCAAGC  
GGTCGTCCGCTGCTGCCTTTTGCAGCCGATCGCGTTGAAATCCATGCACCGCTGCCGGATGAAGGCTGGAGCCAT  
GTGCGCGATCTGGGTAGCCCGCGTTTGGATGTGACCGTGACCGATGCAGGTGGTCGCGTGTGCGTTTCGTGTTACC  
GGTCTGGCCCTGCGTGAAGCCAAACCGGAACCGAGCATCGAT**TGAGAATTC** (Stop codon and C-terminal  
*EcoRI* site)



**General procedures for recombinant protein expression and purification.** The synthetic BonKR2, BonDH2, OxaKR5 and OxaDH5 genes, sub-cloned into the pET28a vector, were each transformed into *E. coli* BL21(DE3), and the resultant recombinants were cultured under standard conditions. A single recombinant clone of each transformant was inoculated into 10 ml of LB media containing 50 mg/L kanamycin and grown at 37 °C overnight. The overnight culture was then inoculated into 500 ml of Super Broth containing 50 mg/L kanamycin in a 2.5-L flask and grown until an OD<sub>600</sub> of 0.4-0.8. The culture was cooled to 18 °C for 30 min, after which protein expression was induced by addition of 0.2 mM IPTG. The culture was continuously shaken for an additional 40-48 h at 18 °C. The cells were harvested by centrifugation at 4,200g for 20 min and the cell pellet was dissolved in 35 ml lysis buffer (500 mM NaCl, 50 mM phosphate, 50 mM imidazole, 1 mg/ml of lysozyme, pH 7.8) and stored at -80 °C. The cells in lysis buffer from the -80 °C freezer were thawed at room temperature, followed by sonication. The cell supernatant and the pellet were separated by centrifugation at 23,000g for 30 min and the supernatant was filtered using an 0.8 µm filter and then loaded onto a pre-charged 5-ml HisTrap FF column (GE Healthcare) pre-equilibrated with lysis buffer. The column was washed with 25 mL lysis buffer and then 25 mL washing buffer (50 mM sodium phosphate, 500 mM NaCl, 60 mM imidazole, pH 7.6). Proteins were eluted from the Ni-column by elution buffer (150 mM NaCl, 50 mM phosphate, 150 mM imidazole, pH 7.5). The eluted fractions were collected and concentrated with an Amicon filter MWCO 30 KDa. The buffer was exchanged with exchange buffer (50 mM sodium phosphate, 10% glycerol, 100 mM NaCl, pH 7.2), concentrated, and stored at -80 °C until use. Protein purity was assessed as >90% by 12% acrylamide SDS-PAGE, and the His<sub>6</sub>-tagged fusion proteins were utilized without further modification. The molecular weight (MW) of each protein was verified on an Agilent Technologies QTOF LC-MS and matched the predicted values.

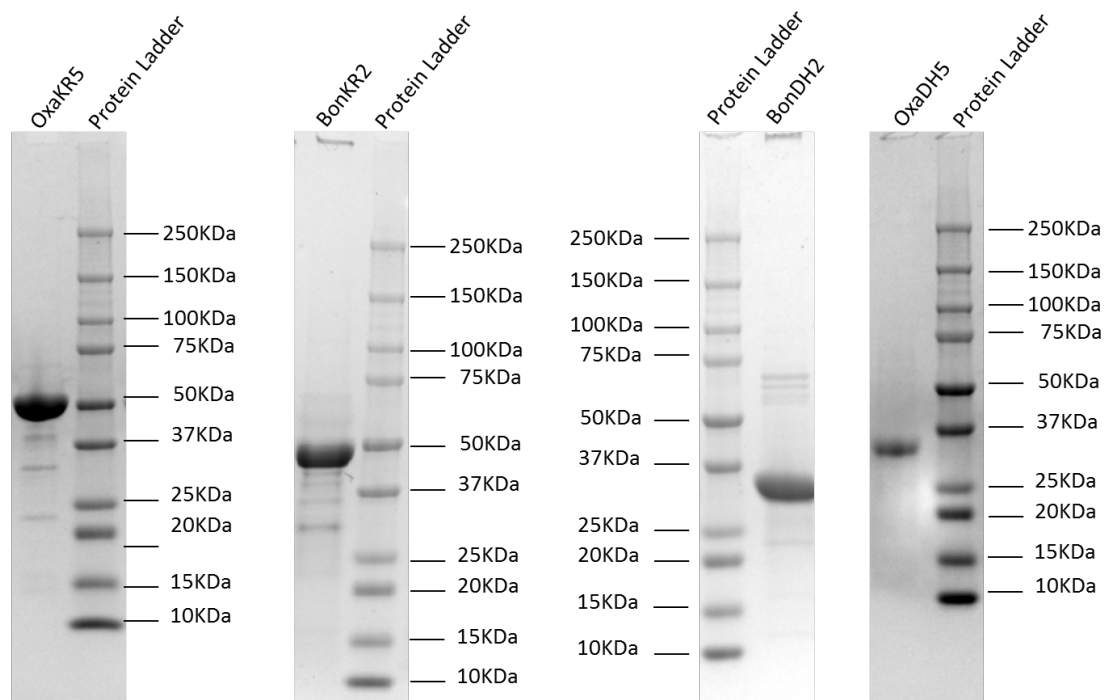

**Figure S5.** SDS PAGE of recombinant OxaKR5, OxaDH5, BonKR2 and BonDH2.

**Table S1.** Predicted MW and observed  $M_D$  of OxaKR5, OxaDH5, BonKR2 and BonDH2.

| Protein | MW (cal, Da) | LC-QTOF ( $M_D$ , Da) |
|---------|--------------|-----------------------|
| OxaKR5  | 53015.54     | 53017.97              |
| OxaDH5  | 35807.51     | 35808.31              |
| BonKR2  | 54025.59     | 54027.45              |
| BonDH2  | 35565.68     | 35565.72              |

**Kinetic assay of reductase activity of recombinant KR domains with (±)-2-methyl-3-ketopentanoyl-SNAC (4) and (±)-2-methyl-3-ketobutanoyl-SNAC (3).** The continuous NADPH-linked assay, used for determination of the steady-state kinetic parameters, was carried out using a microplate plate reader and Falcon polystyrene 96-well plates to monitor NADPH consumption at 340 nm.<sup>11</sup> The reductase activity of each KR domain was assayed using variable concentrations from 0 to 60 mM of (±)-2-methyl-3-ketopentanoyl-SNAC (4) or from 0 to 20 mM of (±)-2-methyl-3-ketobutanoyl-SNAC (4) as the reference substrate. KR proteins were diluted in assay buffer (50 mM sodium phosphate, 100 mM NaCl, pH 7.2; NaCl concentration is very important to keep OxaKR5 in a soluble state) to give a 50 μM stock solution. The (±)-2-methyl-3-ketopentanoyl-SNAC (4) and (±)-2-methyl-3-ketobutanoyl-SNAC (3) thioesters were diluted with DMSO:H<sub>2</sub>O (1:1) solution so as to give 9 different substrate concentrations of between 0 and 60 mM or 0-20 mM in the final mixture (the total amount of DMSO was kept constant at 5% v/v). Each incubation was carried out with 5 μM OxaKR5 or BonKR2, and 2 mM NADPH. The reaction was initiated by addition of substrate. The solutions were quickly mixed by pipetting up and down 3 times. The course of the reaction was followed by monitoring the change in absorbance at 340 nm every 1 min for 30 min. Each substrate concentration was assayed in duplicate. The steady-state kinetic parameters were calculated by fitting the observed rate and substrate concentration data to the Michaelis-Menten equation by nonlinear least squares regression using the SigmaPlot 12.5 program. The reported errors are the statistical deviations calculated by the nonlinear regression analysis.

**Table S2.** Steady-state kinetic parameters for reduction of (±)-2-methyl-3-ketopentanoyl-SNAC (4) and (±)-2-methyl-3-ketobutanoyl-SNAC (3) by OxaKR5 and BonKR2. See Figure S6 and S7 for plots of v vs [S] for each KR domain.

| KR     | Substrate                         | $k_{cat}$ (s <sup>-1</sup> ) | $K_m$ (mM) | $k_{cat}/K_m$ (mM <sup>-1</sup> s <sup>-1</sup> ) |
|--------|-----------------------------------|------------------------------|------------|---------------------------------------------------|
| OxaKR5 | (±)-2-methyl-3-ketopentanoyl-SNAC | 0.051±0.002                  | 0.84±0.15  | 0.061                                             |
|        | (±)-2-methyl-3-ketobutanoyl-SNAC  | 0.053±0.005                  | 1.6±0.5    | 0.033                                             |
| BonKR2 | (±)-2-methyl-3-ketopentanoyl-SNAC | 0.060±0.004                  | 2.9±0.9    | 0.021                                             |
|        | (±)-2-methyl-3-ketobutanoyl-SNAC  | 0.066±0.007                  | 0.82±0.4   | 0.08                                              |

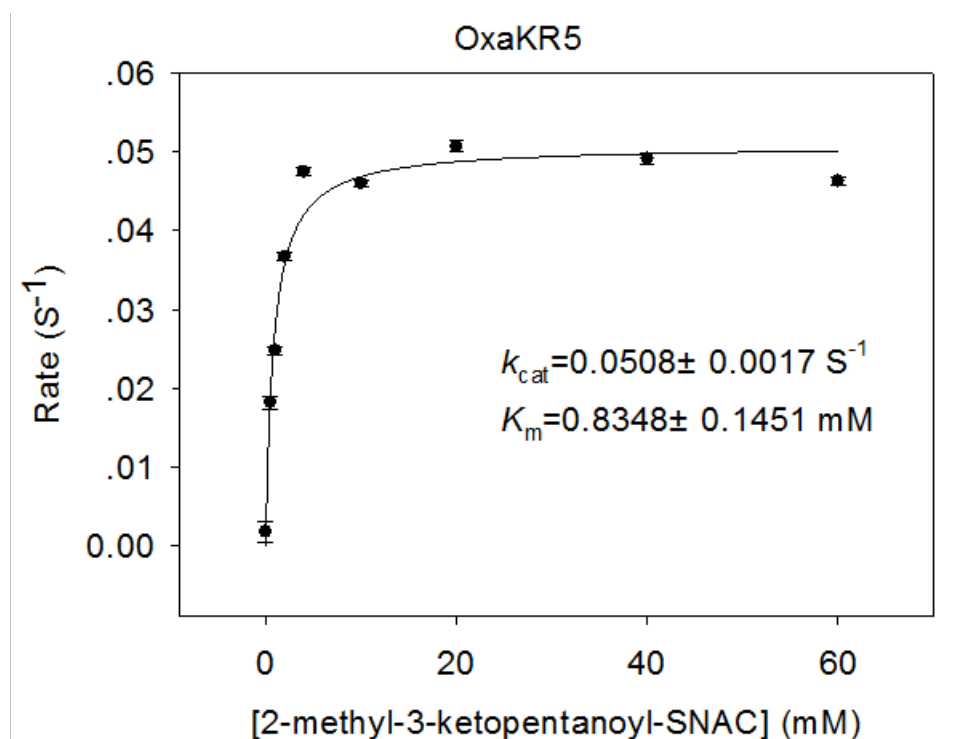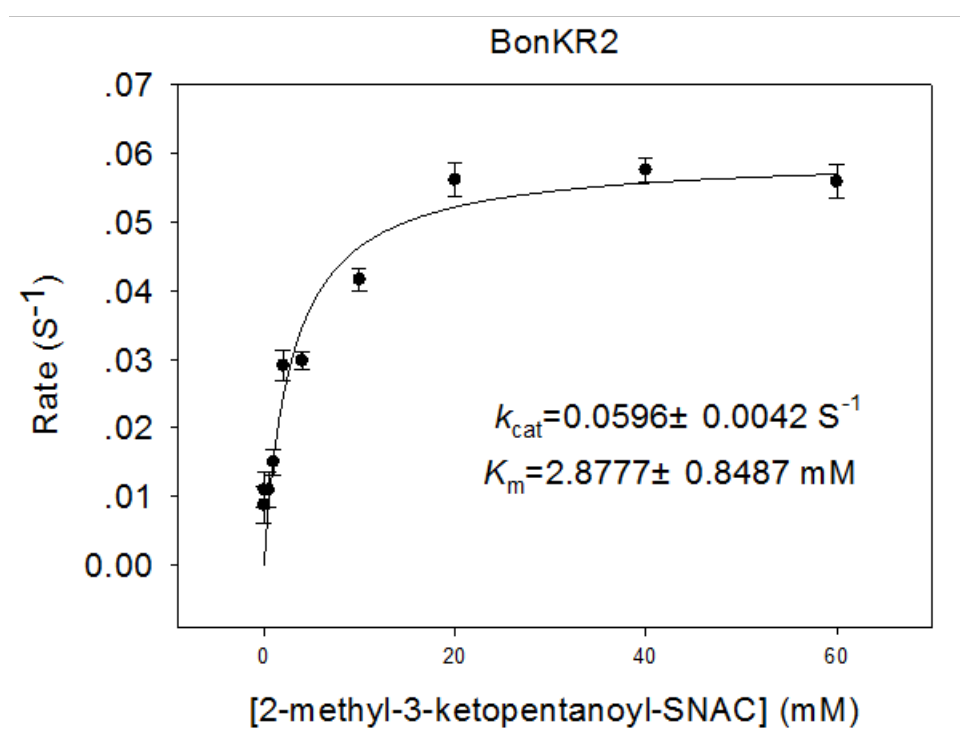

**Figure S6.** Assay of ketoreductase activity with ( $\pm$ )-2-methyl-3-ketopentanoyl-SNAC (**4**). See Table S2 for comparison of steady-state kinetic parameters.

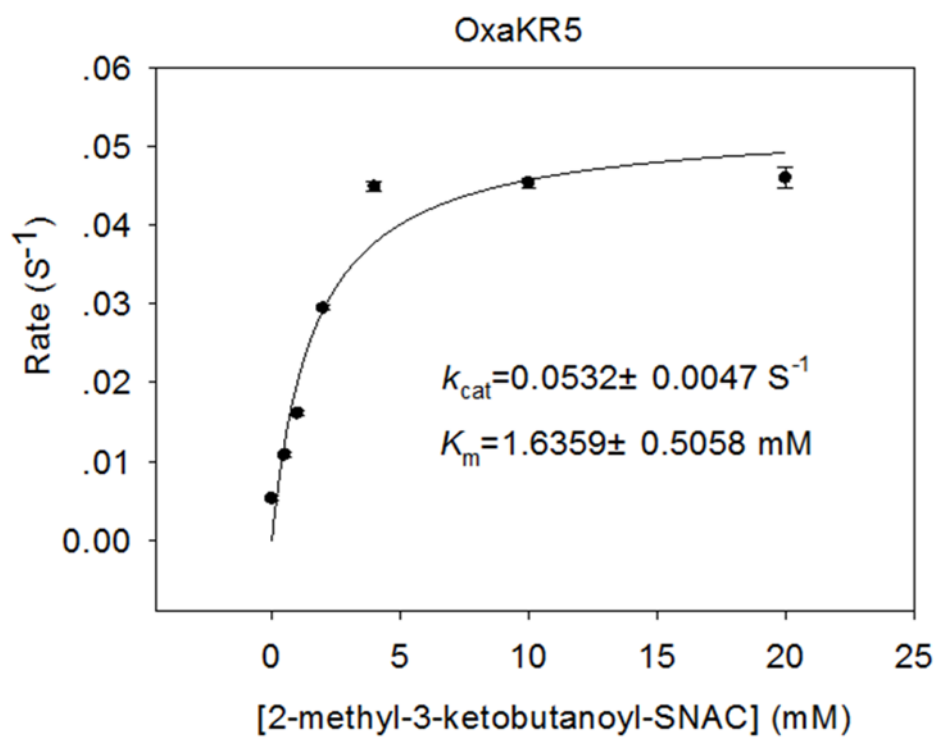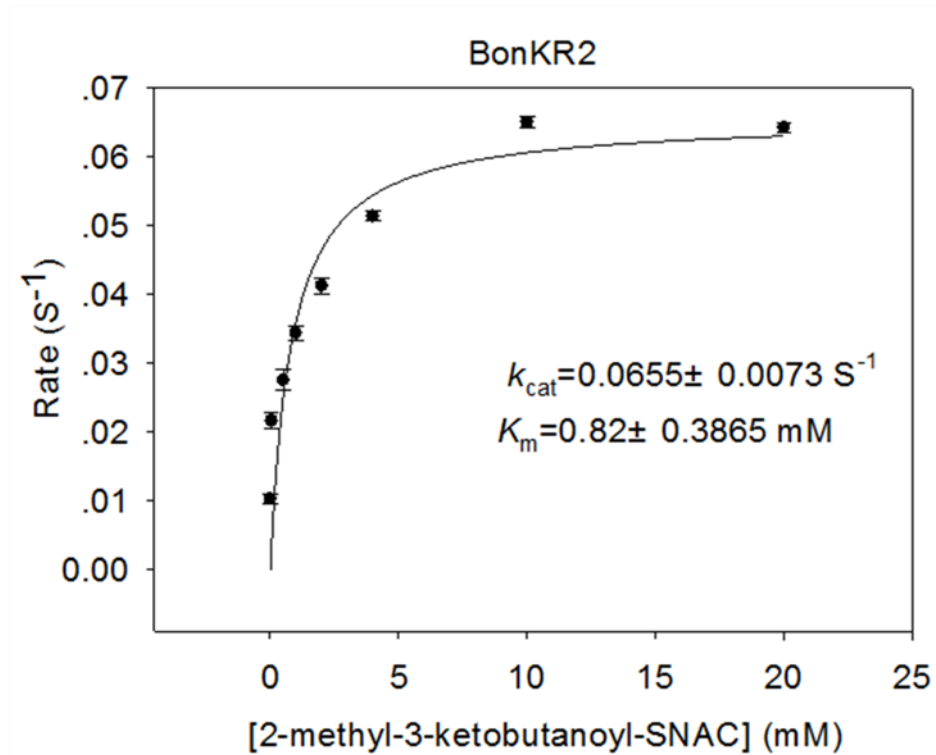

**Figure S7.** Assay of ketoreductase activity with ( $\pm$ )-2-methyl-3-ketobutanoyl-SNAC (**3**). See Table S2 for comparison of steady-state kinetic parameters.

**Incubation of BonKR2 and OxaKR5 with NADPH and acyl-SNAC substrates 3 and 4.** The protocol for reduction of ( $\pm$ )-2-methyl-3-ketopentanoyl-SNAC (**4**) was based on the previously described procedure.<sup>11</sup> In a typical incubation, in a total volume of 500  $\mu$ L containing 1 mM ( $\pm$ )-2-methyl-3-ketopentanoyl-SNAC (**4**) or ( $\pm$ )-2-methyl-3-ketobutanoyl-SNAC (**3**), 2 mM NADPH, 50 mM NaH<sub>2</sub>PO<sub>4</sub> buffer (100 mM NaCl, pH 7.2) containing tris-2-carboxyethyl-phosphine (TCEP, 2.5 mM) and 50  $\mu$ M BonKR2 or OxaKR5. (The incubation mixture also contained  $\sim$ 1% glycerol from protein solutions and DMSO from SNAC substrate solutions). The enzyme mixtures were incubated at room temperature for 2 h, and the reaction was then quenched by addition of 150  $\mu$ L of 0.5 M NaOH solution and heated to 65  $^{\circ}$ C for 20 min. The basic mixture was treated with 200  $\mu$ L of 1 M HCl solution. After centrifugation at 13,000g for 5 min to remove precipitated protein, the supernatant was extracted with 4  $\times$  800  $\mu$ L of ethyl acetate. After evaporation of the solvent, the concentrated organic extract was derivatized with TMS-CHN<sub>2</sub> and analyzed by GC-MS, with XIC monitoring of the *m/z* 88 base peak, as described below.

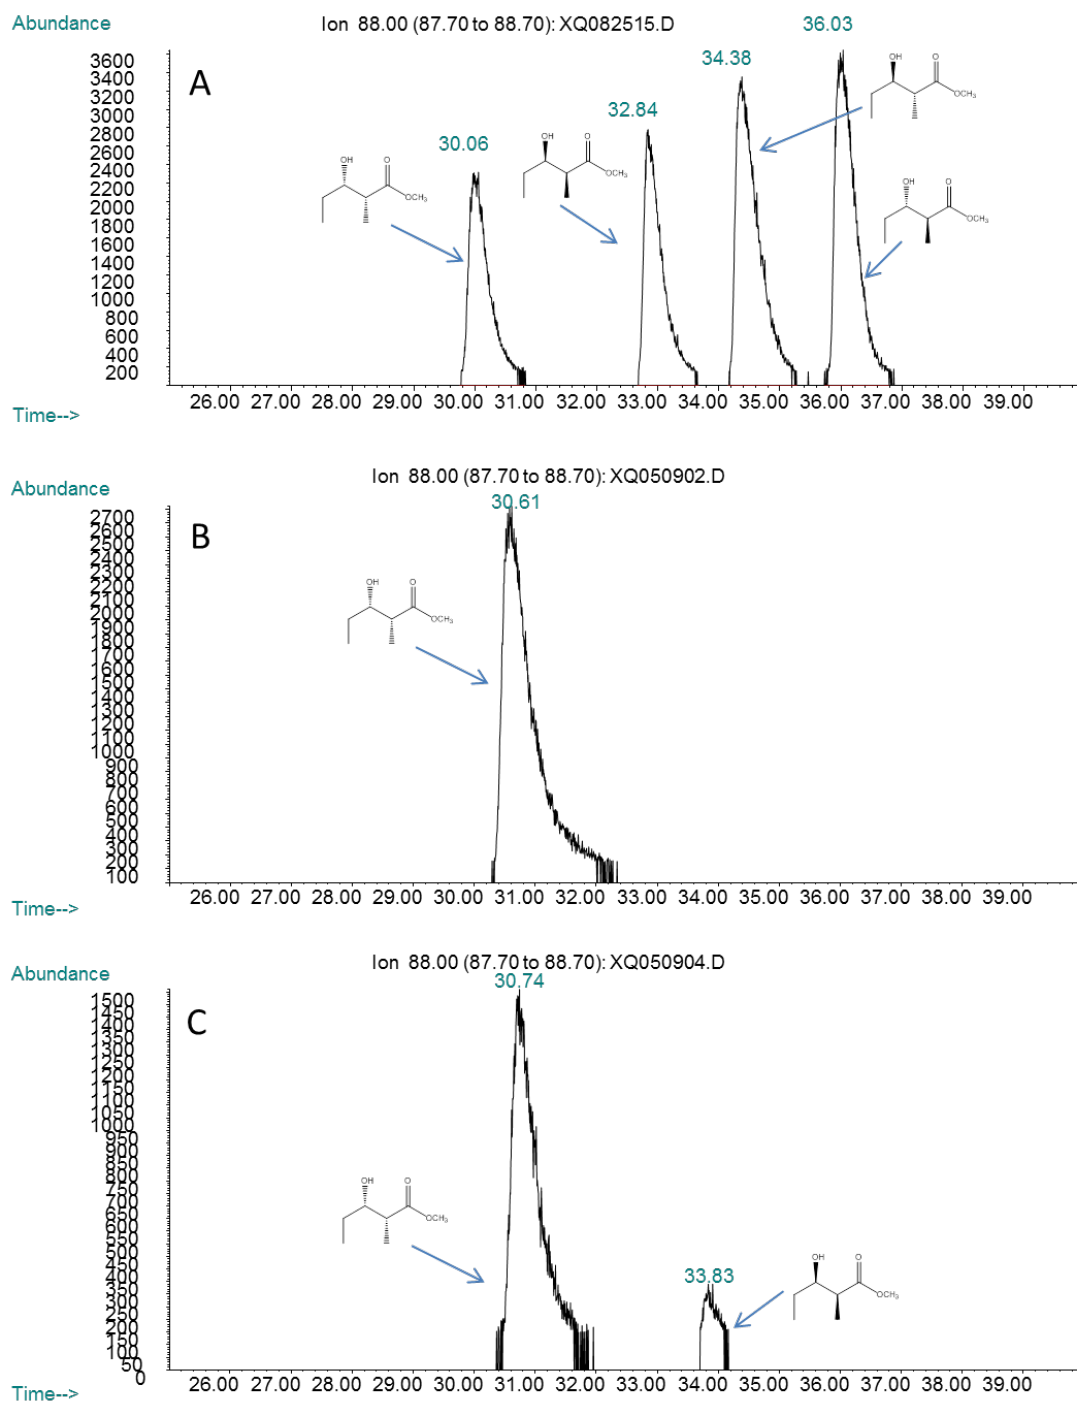

**Figure S8.** GC-MS analysis [XIC  $m/z$  88 (base peak)] of methyl 2-methyl-3-hydroxypentanoates produced by BonKR2-catalyzed reduction of ( $\pm$ )-2-methyl-3-ketopentanoyl-SNAC (**4**). A. Reference Standard. B. BonKR2. C. B plus added methyl (2*S*, 3*R*)-2-methyl-3-hydroxypentanoate.

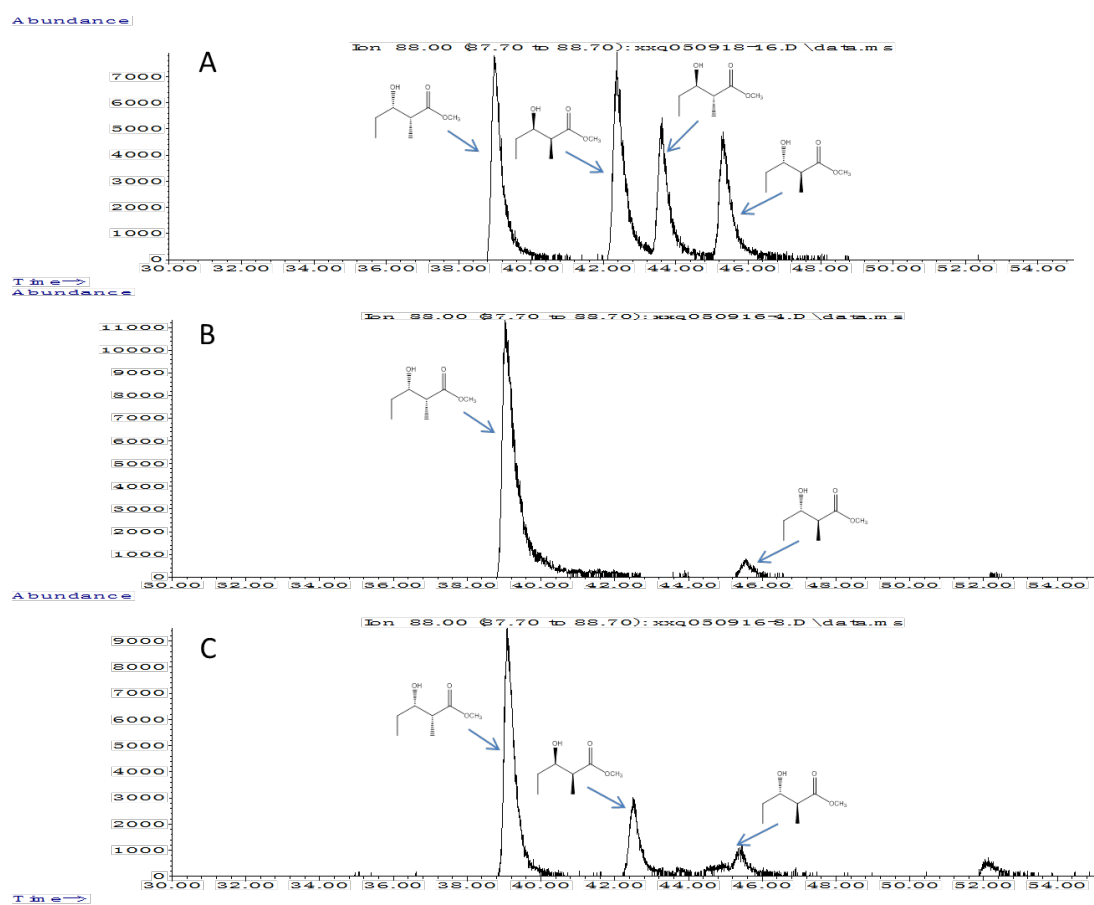

**Figure S9.** GC-MS analysis [XIC  $m/z$  88 (base peak)] of methyl 2-methyl-3-hydroxypentanoates produced by OxaKR5-catalyzed reduction of ( $\pm$ )-2-methyl-3-ketopentanoyl-SNAC (**4**). A. Reference Standard. B. OxaKR5. C. B plus added methyl (2*S*, 3*R*)-2-methyl-3-hydroxypentanoate.



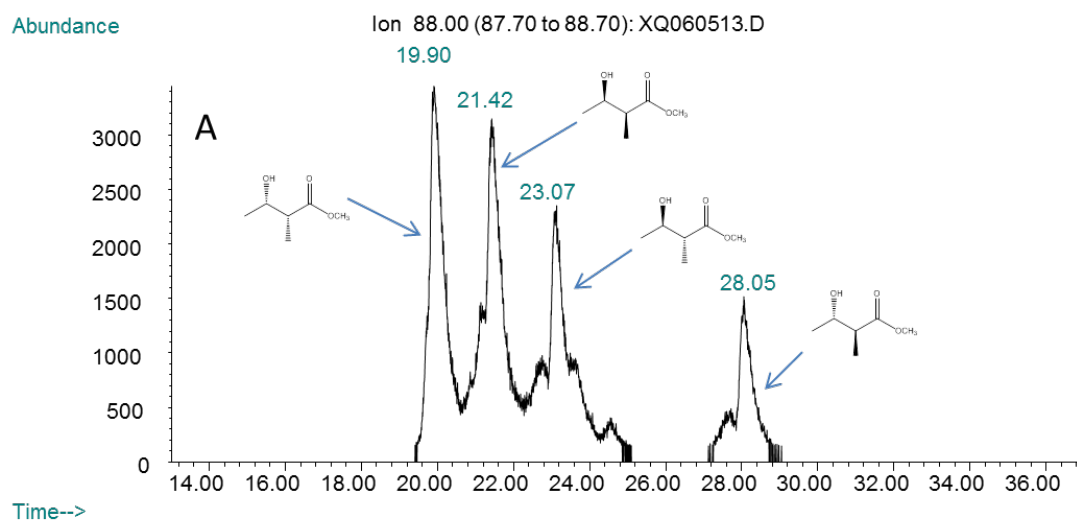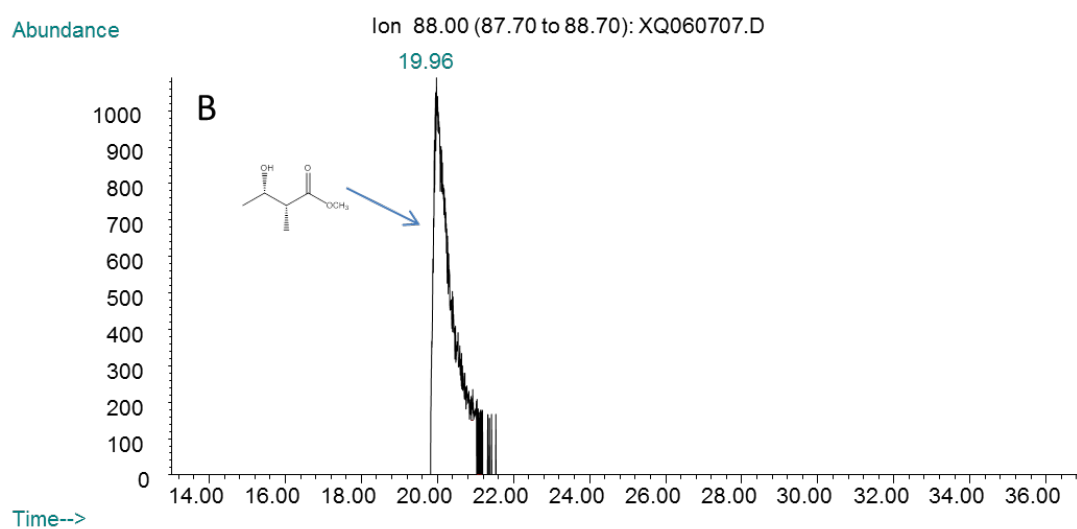

**Figure S10.** GC-MS analysis [XIC  $m/z$  88 (base peak)] of methyl 2-methyl-3-hydroxybutyrate produced by BonKR2-catalyzed reduction of ( $\pm$ )-2-methyl-3-ketobutanoyl-SNAC (**3**). A. Reference Standard. B. BonKR2.

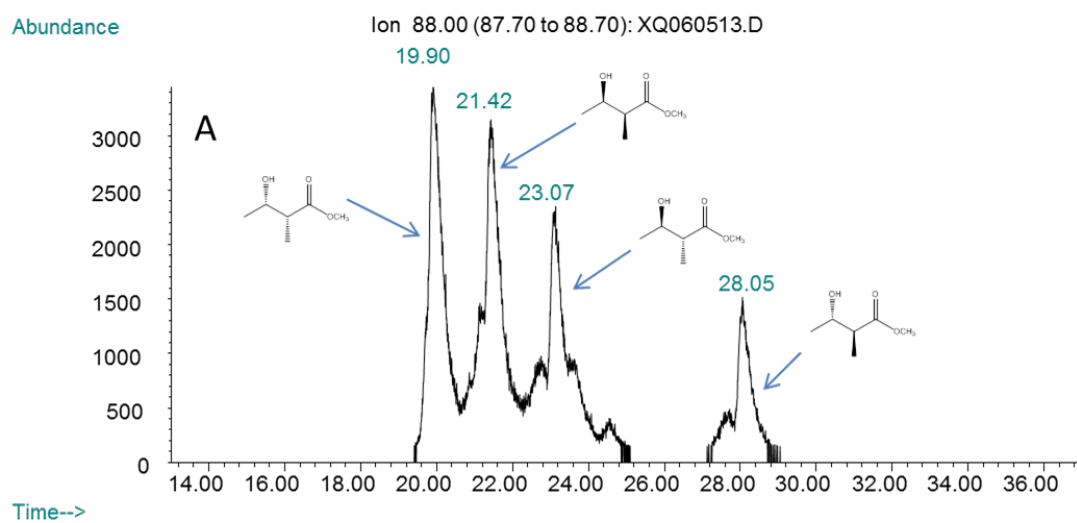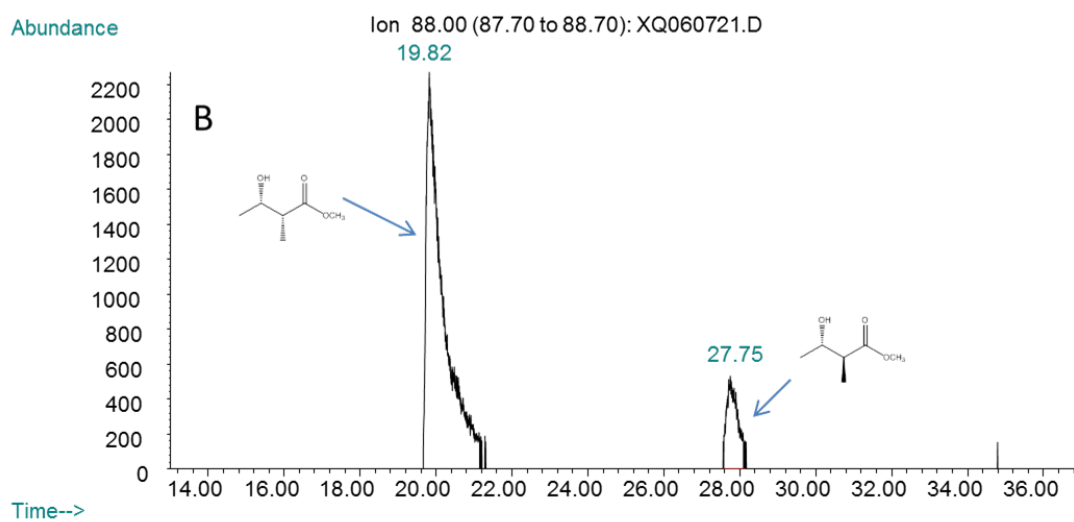

**Figure S11.** GC-MS analysis [XIC  $m/z$  88 (base peak)] of methyl 2-methyl-3-hydroxybutyrate produced by OxaKR5-catalyzed reduction of ( $\pm$ )-2-methyl-3-ketobutanoyl-SNAC (**3**). A. Reference Standard. B. OxaKR5.

**Incubation of BonKR2 and OxaKR5 with chemoenzymatically generated (2R)-2-methyl-3-ketopentanoyl-S<sub>Ery</sub>ACP6.**

The chemoenzymatic preparation of (2R)-2-methyl-3-ketopentanoyl-S<sub>Ery</sub>ACP6 and its use for the determination of the stereochemistry KR reduction has been previously described.<sup>1,2</sup> In a typical assay, 5 mM propionyl-SNAC was pre-incubated with 40 μM Ery[KS6][AT6] in a total volume of 500 μL of phosphate buffer (50 mM sodium phosphate, 100 mM NaCl, pH 7.2) containing tris-2-carboxyethyl-phosphine (TCEP, 2.5 mM). After 30 min, 200 μM of *holo*-EryACP6, 300 μM methylmalonyl-CoA, 2 mM NADPH and 300 μM BonKR2 or OxaKR5 were added. The enzyme mixture was incubated at room temperature for an additional hour. The reaction was quenched by addition of 150 μL of 0.5 M NaOH, the mixture incubated at 65 °C for 20 min. The basic reaction mixture was acidified with 200 μL of 1 M HCl and then extracted with ethyl acetate (600 μL). The concentrated organic extract was derivatized with TMS-CHN<sub>2</sub> and the resulting methyl ester analyzed by GC-MS, as described below.

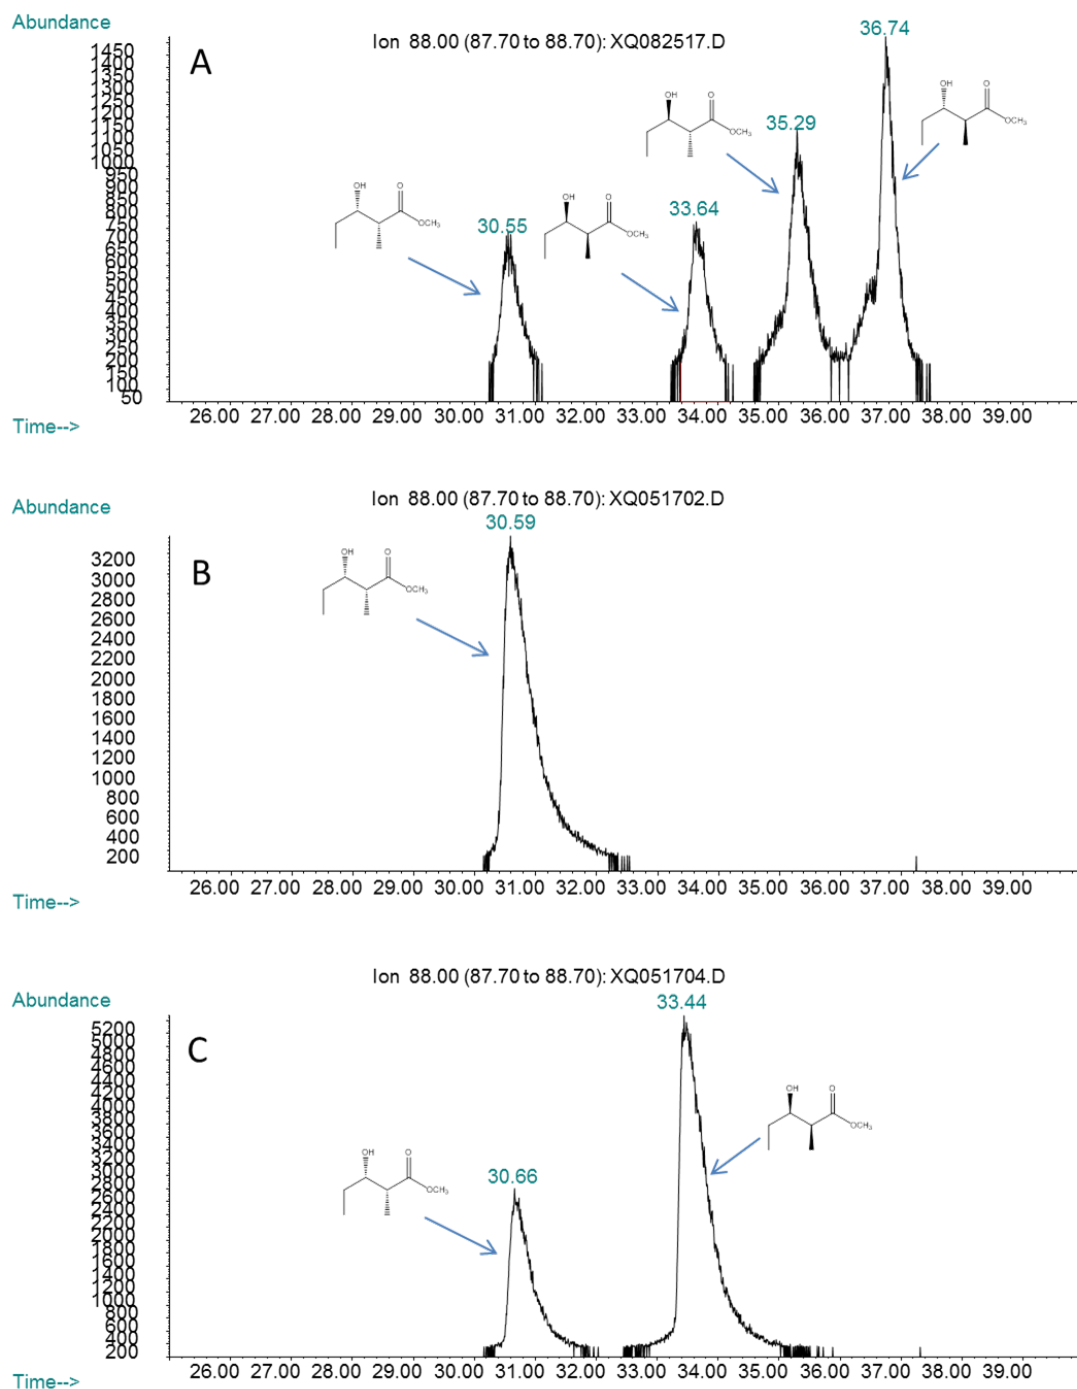

**Figure S12.** GC-MS analysis [XIC  $m/z$  88 (base peak)] of methyl 2-methyl-3-hydroxypentanoate produced by BonKR2-catalyzed reduction of (2*R*)-2-methyl-3-ketopentanoyl-EryACP6 produced by incubation of Ery[KS6][AT6], propionyl-SNAC, methylmalonyl-CoA and *holo*-EryACP6. A. Reference Standard. B. BonKR2. C. B (**8-Me**) plus added methyl (2*S*, 3*R*)-2-methyl-3-hydroxypentanoate.

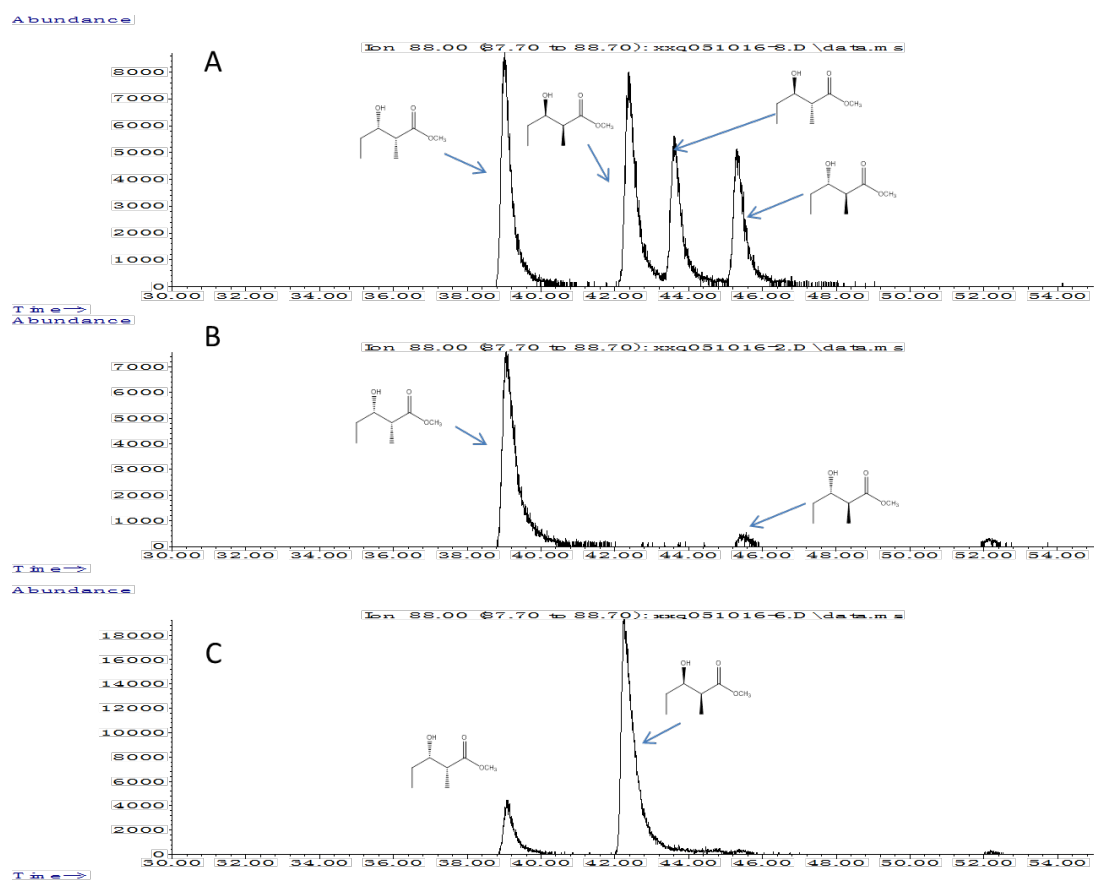

**Figure S13.** GC-MS analysis [XIC  $m/z$  88 (base peak)] of methyl 2-methyl-3-hydroxypentanoates produced by OxaKR5-catalyzed reduction of (2*R*)-2-methyl-3-ketopentanoyl-EryACP6 produced by incubation of Ery[KS6][AT6], propionyl-SNAC, methylmalonyl-CoA and *holo*-EryACP6. A. Reference Standard. B. OxaKR5. C. B (8-Me) plus added methyl (2*S*, 3*R*)-2-methyl-3-hydroxypentanoate.

### **Incubation of recombinant BonKR2 and OxaKR5 with reconstituted BonKS2, BonACP2, and BonMT2.**

The (2*R*)-2-methyl-3-ketopentanoyl-BonACP2 (**13**) or (2*R*)-2-methyl-3-ketobutanoyl-BonACP2 (**12**) were generated as previously described.<sup>4</sup> In a typical assay, 5 mM propionyl-SNAC or acetyl-SNAC was pre-incubated with 200  $\mu$ M BonKS2 in a total volume of 200  $\mu$ L of phosphate buffer (50 mM sodium phosphate, 100 mM NaCl, 2.5 mM TCEP, pH 7.2). In another tube, 200  $\mu$ L of phosphate buffer (50 mM sodium phosphate, 100 mM NaCl, 2.5 mM TCEP, pH 7.2) containing 500  $\mu$ M *apo*-BonACP2, 10  $\mu$ M Sfp, 10 mM MgCl<sub>2</sub> and 600  $\mu$ M malonyl-CoA were incubated at room temperature for 30 min. The solution mixture containing fresh chemoenzymatically-generated malonyl-BonACP2 was transferred into the tube with the preincubated mixture of propionyl-SNAC or acetyl-SNAC and BonKS2 and the solution was incubated at room temperature for 2 h. To this solution was added (final concentration) 50  $\mu$ M BonMT2, 15 mM SAM, and 50  $\mu$ M SAH nucleosidase. After 15 min, 100  $\mu$ L solutions containing 6 mM NADPH and 600  $\mu$ M BonKR2 or OxaKR5 in assay buffer (50 mM sodium phosphate, 100 mM NaCl, 2.5 mM TCEP, pH 7.2) were added. After 1 h, the enzyme reaction mixture was quenched by mixing with 100  $\mu$ L of 0.5 M NaOH. The resulting mixture was incubated at 65 °C for 30 min. After acidification with 150  $\mu$ L of 1 M HCl and extraction with ethyl acetate (4 $\times$ 600  $\mu$ L), the concentrated organic extract was methylated by treatment with TMS-CHN<sub>2</sub> and analyzed by chiral GC-MS, as described below.

**Chiral GC-MS analysis of BonKR2 and OxaKR5 reduction products.** The concentrated organic extracts of the above-described enzymatic reductions with BonKR2 or OxaKR5 were dissolved in 200  $\mu$ L of methanol and then treated with 5  $\mu$ L of TMS-diazomethane (2 M in hexane) for 10 min at room temperature. The derived reduced 2-methyl-3-hydroxybutyryl and 2-methyl-3-hydroxypentanoyl methyl esters were directly analyzed by chiral GC-MS. For analysis of stereochemistry of 2-methyl-3-hydroxypentanoic acid methyl esters generated by OxaKR5, GC-MS spectra were recorded on an Agilent 5977A Series GC-MSD instrument, 70 eV EI in positive ion mode, using a Varian CP-Chirasil-DEX CB capillary column (25 m  $\times$  0.25 mm, Agilent Technologies) and a temperature program of (1) initial temp 60 °C for 1 min, (2) increase at rate 0.3 °C/min up to 75 °C, (3) 5 °C/min up to 90 °C, and then 20 °C/min to final temp 200 °C. For analysis of the stereochemistry of 2-methyl-3-hydroxypentanoic acid methyl esters generated by BonKR2, GC-MS spectra were recorded on a GC-MS Hewlett-Packard Series II GC-MSD instrument, 70 eV EI in positive ion mode, using a Varian CP-Chirasil-DEX CB capillary column (25 m  $\times$  0.32 mm, Agilent Technologies) and a temperature program of (1) initial temp 60 °C for 1 min, (2) increase at rate 0.3 °C/min up to 70 °C, (3) 5 °C/min up to 90 °C, and then 20 °C/min to final temp 200 °C. The extracted ion current (XIC) of the chromatogram was analyzed set on the base peak at *m/z* 88 of methyl 2-methyl-3-hydroxypentanoate. The eluent peaks were directly compared by ret. time and MS with authentic standards of all four diastereomers, as previously described,<sup>8</sup> and confirmed by co-injection of authentic methyl (2*S*,3*R*)-2-methyl-3-hydroxypentanoate (**8-Me**).

For the analysis of methyl 2-methyl-3-hydroxybutanoate generated by incubations with BonKR2 or OxaKR5, GC-MS spectra were recorded on the Hewlett-Packard Series II GC-MSD instrument, 70 eV EI in positive ion mode using a Varian CP-Chirasil-DEX CB capillary column (25 m  $\times$  0.32 mm, Agilent Technologies) and a temperature program of (1) initial temp 60 °C for 1 min; (2) increase at rate 0.3 °C/min up to 70 °C, hold for 1 min at 70 °C; (3) 5 °C/min up to 90 °C, hold for 1 min at 90 °C and then 20 °C/min to final temp 200 °C. The extracted ion current (XIC) of the chromatogram was analyzed set on the base peak at *m/z* 88 of methyl 2-methyl-3-hydroxybutyrate.

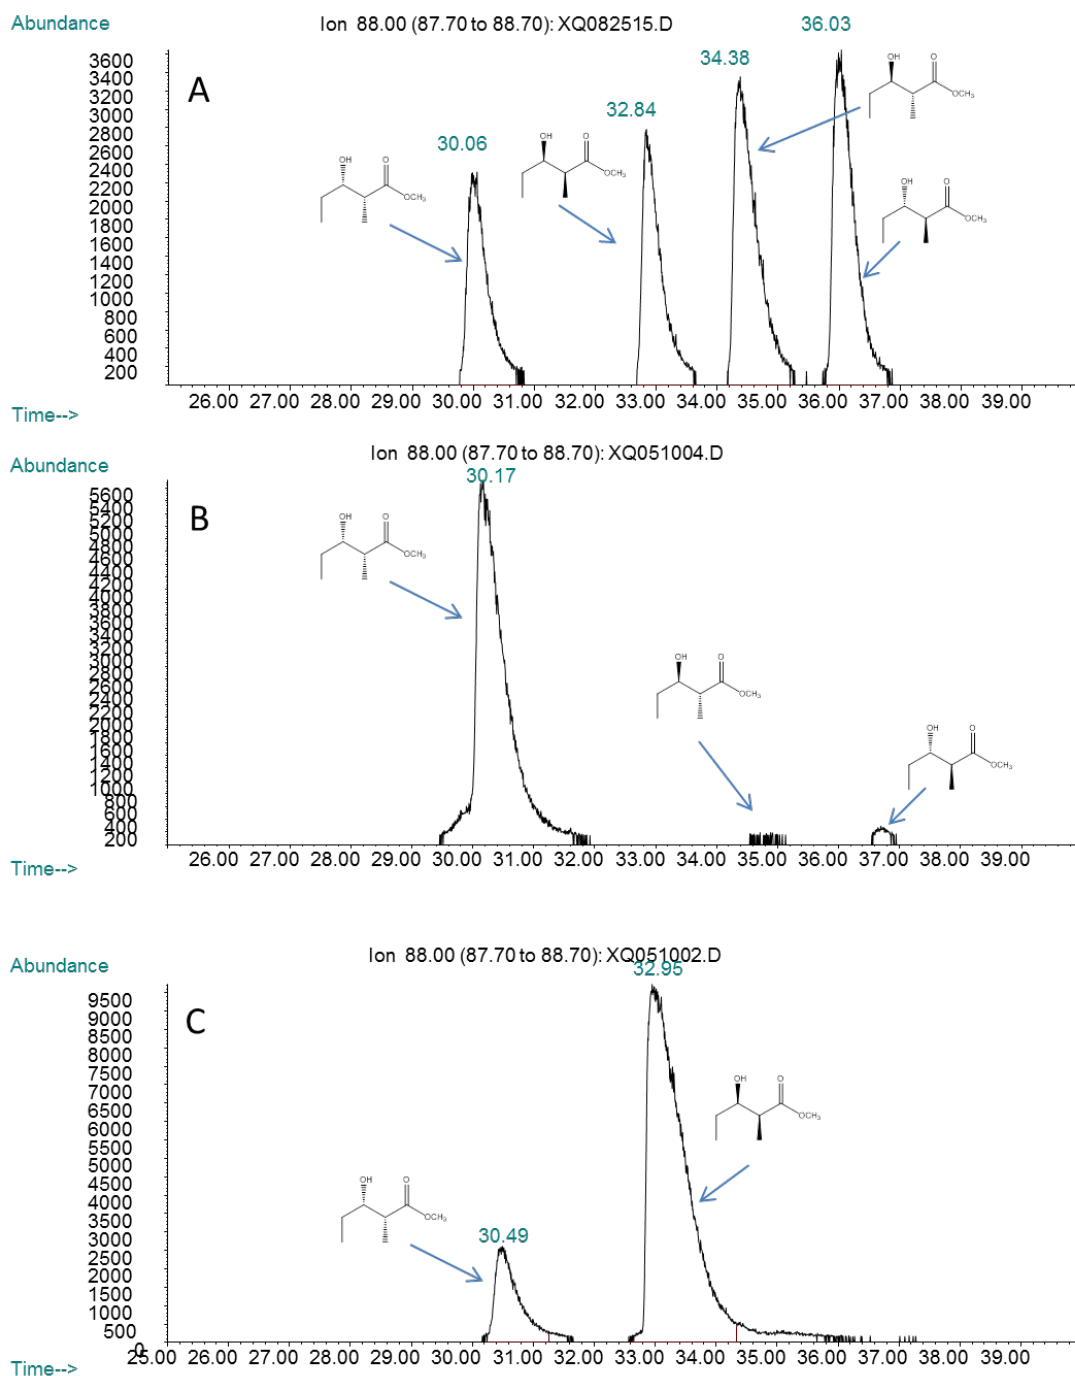

**Figure S14.** GC-MS analysis [XIC  $m/z$  88 (base peak)] of methyl 2-methyl-3-hydroxypentanoates produced by BonKR2-catalyzed reduction of (2*R*)-2-methyl-3-ketopentanoyl-BonACP2 (**13**) generated by incubation of propionyl-SNAC, BonKS2, BonACP2, BonMT2, malonyl-CoA, SAH nucleosidase and SAM. A. Reference Standard. B. BonKR2. C. B (**8-Me**) plus added methyl (2*R*,3*S*)-2-methyl-3-hydroxypentanoate.

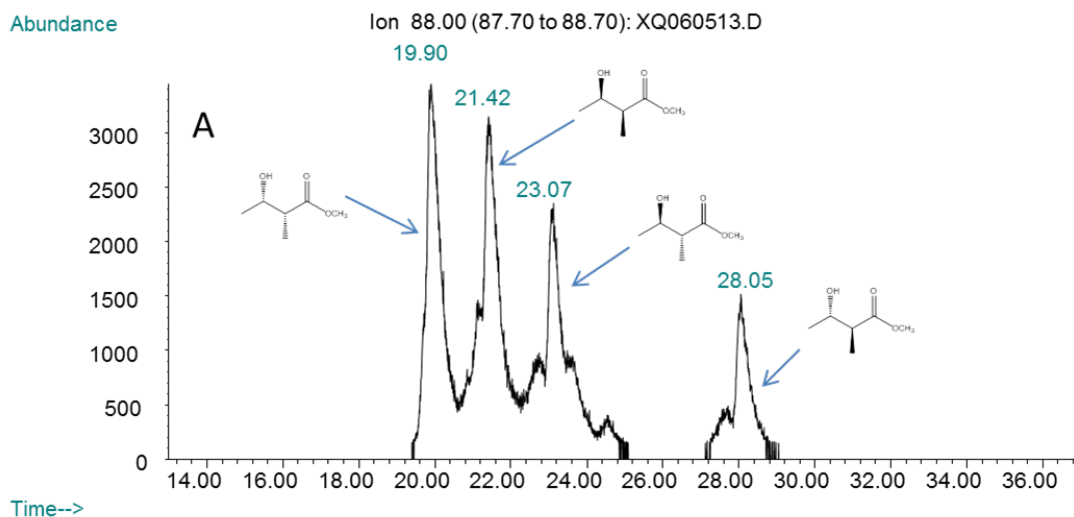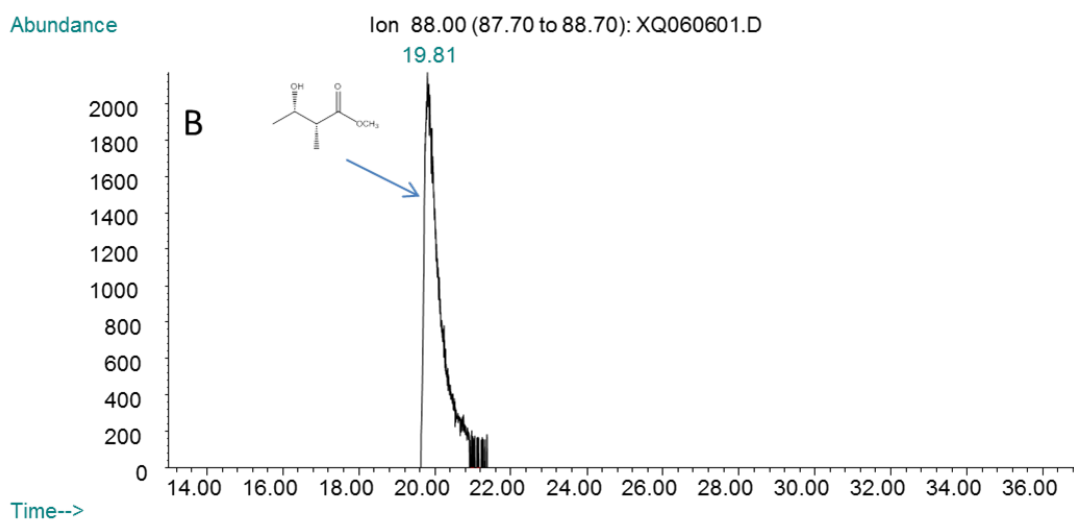

**Figure S15.** GC-MS analysis [XIC  $m/z$  88 (base peak)] of methyl 2-methyl-3-hydroxybutyrate produced by BonKR2-catalyzed reductions of (2*R*)-2-methyl-3-ketobutyryl-BonACP2 (**12**) generated by incubation of acetyl-SNAC, BonKS2, BonACP2, BonMT2, malonyl-CoA, SAH nucleosidase and SAM. A. Reference Standard. B. BonKR2.



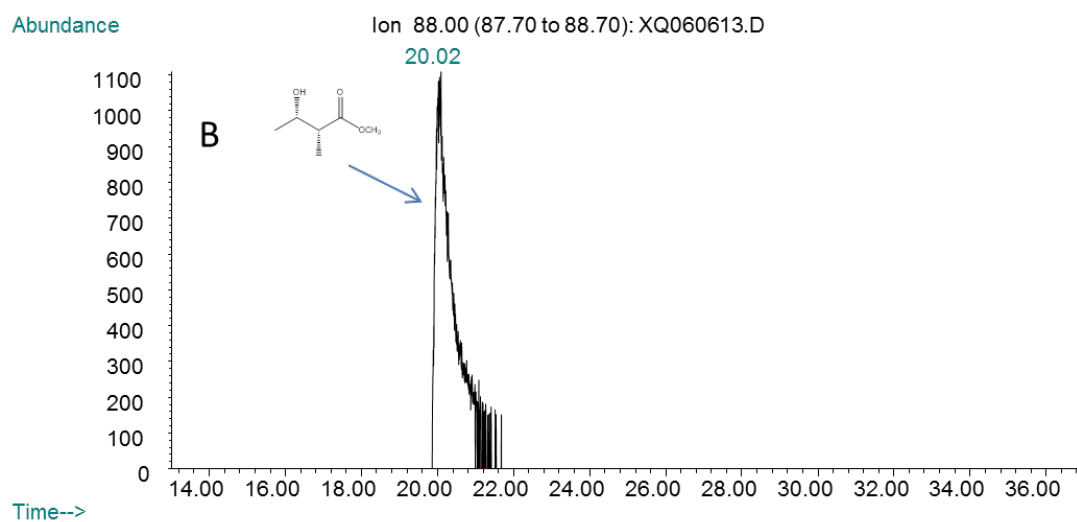

**Figure S16.** GC-MS analysis [XIC  $m/z$  88 (base peak)] of methyl 2-methyl-3-hydroxybutyrate produced by OxaKR5-catalyzed reduction of (2*R*)-2-methyl-3-ketobutyryl-BonACP2 (**12**) generated by incubation of acetyl-SNAC, BonKS2, BonACP2, BonMT2, malonyl-CoA, SAH nucleosidase and SAM. A. Reference Standard. B. OxaKR5.

**Table S3.** Stereospecificity of the KR-catalyzed reduction of ( $\pm$ )-2-methyl-3-ketopentanoyl-SNAC (**4**) or (2*R*)-2-methyl-3-ketopentanoyl-EryACP6, generated by incubation of propionyl-SNAC, Ery[KS6][AT6], *holo*-EryACP6 and methylmalonyl-CoA, or of (2*R*)-2-methyl-3-ketopentanoyl-BonACP2 (**13**), generated by incubation of propionyl-SNAC, BonKS2, *apo*-BonACP2, Sfp, malonyl-CoA, BonMT2 and SAM.

| protein                                                                            | Methyl 2-methyl-3-hydroxypentanoate (C5) |                           |                           |                           |
|------------------------------------------------------------------------------------|------------------------------------------|---------------------------|---------------------------|---------------------------|
|                                                                                    | (2 <i>R</i> ,3 <i>S</i> )                | (2 <i>S</i> ,3 <i>R</i> ) | (2 <i>R</i> ,3 <i>R</i> ) | (2 <i>S</i> ,3 <i>S</i> ) |
|                                                                                    | (%)                                      | (%)                       | (%)                       | (%)                       |
| <u>Incubation with (<math>\pm</math>)-2-methyl-3-ketopentanoyl-SNAC (<b>4</b>)</u> |                                          |                           |                           |                           |
| OxaKR5                                                                             | >99                                      | 0                         | 0                         | <1                        |
| BonKR2                                                                             | 100                                      | 0                         | 0                         | 0                         |
| <u>Propionyl-SNAC + Ery[KS6][AT6] + EryACP6 + MMCoA</u>                            |                                          |                           |                           |                           |
| OxaKR5                                                                             | >99                                      | 0                         | 0                         | <1                        |
| BonKR2                                                                             | 100                                      | 0                         | 0                         | 0                         |
| <u>Propionyl-SNAC + BonKS2 + <i>apo</i>-BonACP2 + Sfp + MCoA+BonMT2+SAM</u>        |                                          |                           |                           |                           |
| BonKR2                                                                             | >98                                      | 0                         | <1                        | <1                        |

**Table S4.** Stereospecificity of the KR-catalyzed reduction of ( $\pm$ )-2-methyl-3-ketobutyryl-SNAC (**3**) or of (2*R*)-2-methyl-3-ketobutyryl-BonACP2, generated by incubation of acetyl-SNAC, BonKS2, *apo*-BonACP2, Sfp, malonyl-CoA, BonMT2 and SAM.

| protein                                                                | Methyl 2-methyl-3-hydroxypentanoate (C4) |                           |                           |                           |
|------------------------------------------------------------------------|------------------------------------------|---------------------------|---------------------------|---------------------------|
|                                                                        | (2 <i>R</i> ,3 <i>S</i> )                | (2 <i>S</i> ,3 <i>R</i> ) | (2 <i>R</i> ,3 <i>R</i> ) | (2 <i>S</i> ,3 <i>S</i> ) |
|                                                                        | (%)                                      | (%)                       | (%)                       | (%)                       |
| <u>Incubation with 2-methyl-3-ketobutyryl-SNAC (<b>3</b>)</u>          |                                          |                           |                           |                           |
| OxaKR5                                                                 | 90                                       | 0                         | 0                         | 10                        |
| BonKR2                                                                 | 100                                      | 0                         | 0                         | 0                         |
| <u>Acetyl-SNAC + BonKS2 + <i>apo</i>-BonACP2 + Sfp+MCoA+BonMT2+SAM</u> |                                          |                           |                           |                           |
| OxaKR5                                                                 | 100                                      | 0                         | 0                         | 0                         |
| BonKR2                                                                 | 100                                      | 0                         | 0                         | 0                         |

### **Incubation of BonDH2 and OxaDH5 with chemoenzymatically generated**

**(2*R*,3*S*)-2-methyl-3-hydroxybutyryl-BonACP2.** Chemoenzymatically generated

(2*R*,3*S*)-2-methyl-3-hydroxybutyryl-BonACP2 was incubated with 50  $\mu$ M BonDH2, OxaDH5, or NigDH1 (as negative control) in assay buffer (50 mM sodium phosphate, 100 mM NaCl, 2.5 mM TCEP, pH 7.2). After 30 min, the diketide product was hydrolytically released from BonACP2 by treatment with PICS TE (50  $\mu$ M) for 10 min at room temperature. The reaction mixture was acidified to pH <3 by addition of 1 M HCl. The C4 acids were extracted with 3  $\times$  800  $\mu$ L ethyl acetate and the solvent was removed by rotary evaporation. The concentrated organic extract was taken up in 200  $\mu$ L of dichloromethane and directly analyzed by GC-MS. GC-MS spectra were recorded on GC-MS Hewlett-Packard Series II GC-MSD instrument, 70 eV EI in positive ion mode, using a Varian CP-Chirasil-DEX CB capillary column (25 m  $\times$  0.32 mm, Agilent Technologies) and a temperature program of (1) initial temp 80  $^{\circ}$ C for 1 min; (2) increase at rate 0.5  $^{\circ}$ C /min up to 90  $^{\circ}$ C, hold at 90  $^{\circ}$ C for 5 min; (3) 20  $^{\circ}$ C /min up to 200  $^{\circ}$ C and then 20  $^{\circ}$ C /min to final temp 210  $^{\circ}$ C for 1 min. The extracted ion current (XIC) of the chromatogram was analyzed set on the base peak at  $m/z$  100 of the (*Z*)- and (*E*)-2-methyl-2-butenic acid, with direct comparison of both ret. time and MS to authentic standards of each geometric isomer of 2-methyl-2-butenic acid. There was no detectable dehydrated product from the control incubation with NigDH1.

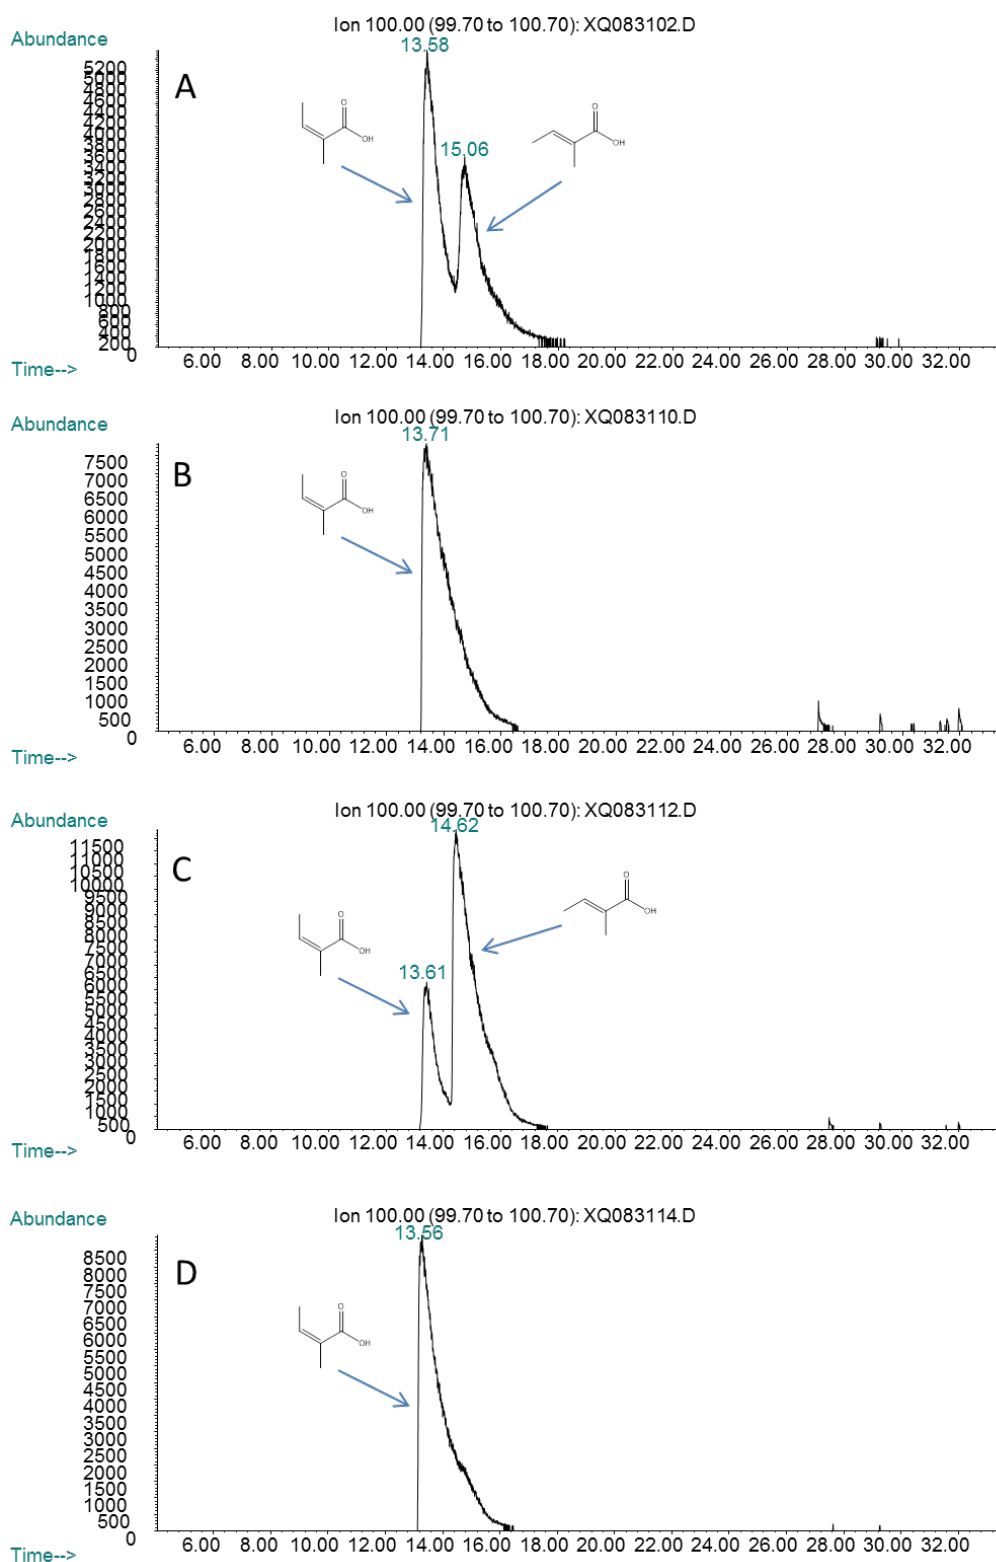

**Figure S17.** GC-MS analysis [XIC  $m/z$  100 (base peak)] of 2-methyl-2-butenoic acid ((*Z*)-17) produced by BonDH2-catalyzed dehydration of (*2R,3S*)-2-methyl-3-hydroxybutyryl-BonACP2 (**14**), generated by incubation of acetyl-SNAC, BonKS2, *apo*-BonACP2, Sfp, BonMT2, malonyl-CoA, SAH nucleosidase, SAM, BonKR2 and NADPH, followed by PICS TE-catalyzed hydrolysis. A. Reference Standard. B. BonDH2. C. B + (*E*)-2-methyl-2-butenoic acid. D. B + (*Z*)-2-methyl-2-butenoic acid (**17**).

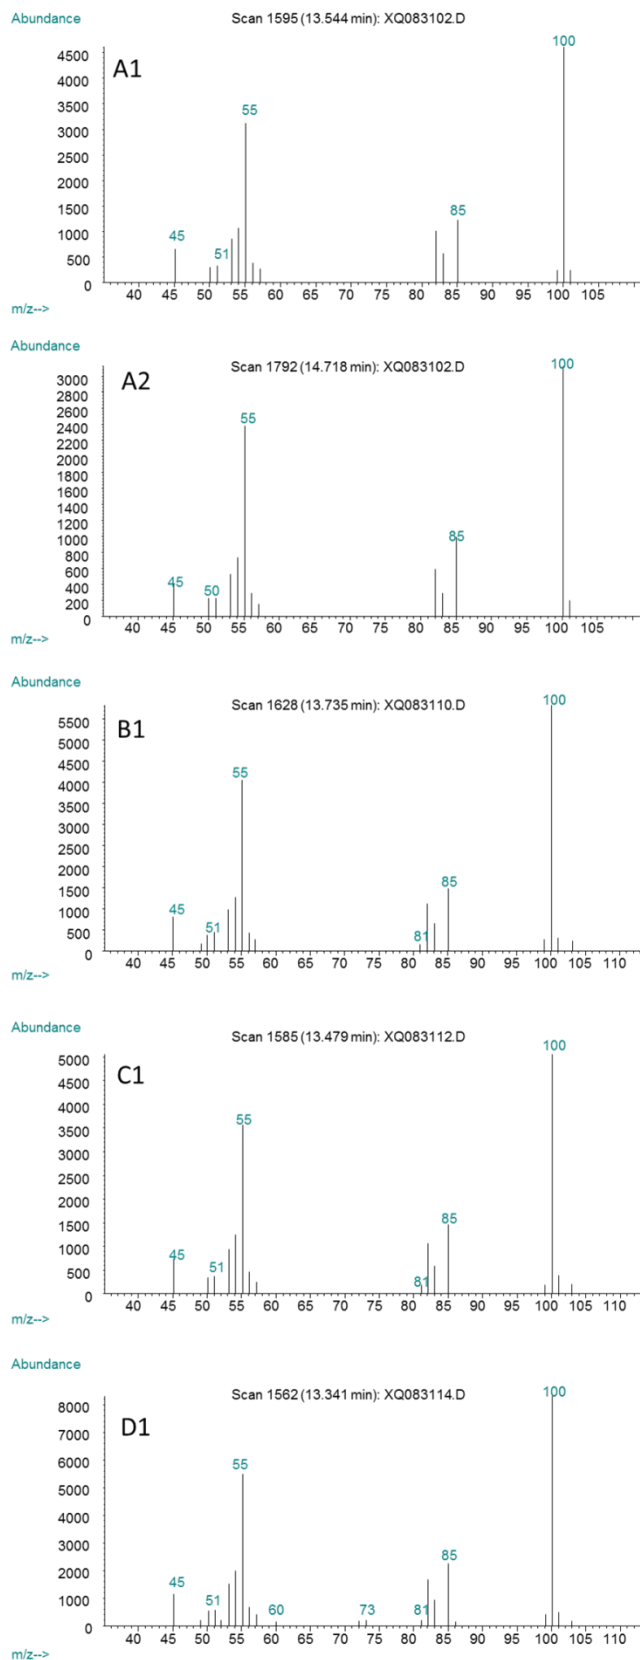

**Figure S17** (cont). A1 and A2. MS of (*Z*)- and (*E*)-2-methyl-2-butenoic acid from A; B1. MS of (*Z*)-2-methyl-2-butenoic acid from B; C1. MS of (*Z*)-2-methyl-2-butenoic acid from C; D1. MS of (*Z*)-2-methyl-2-butenoic acid (**17**) from D.

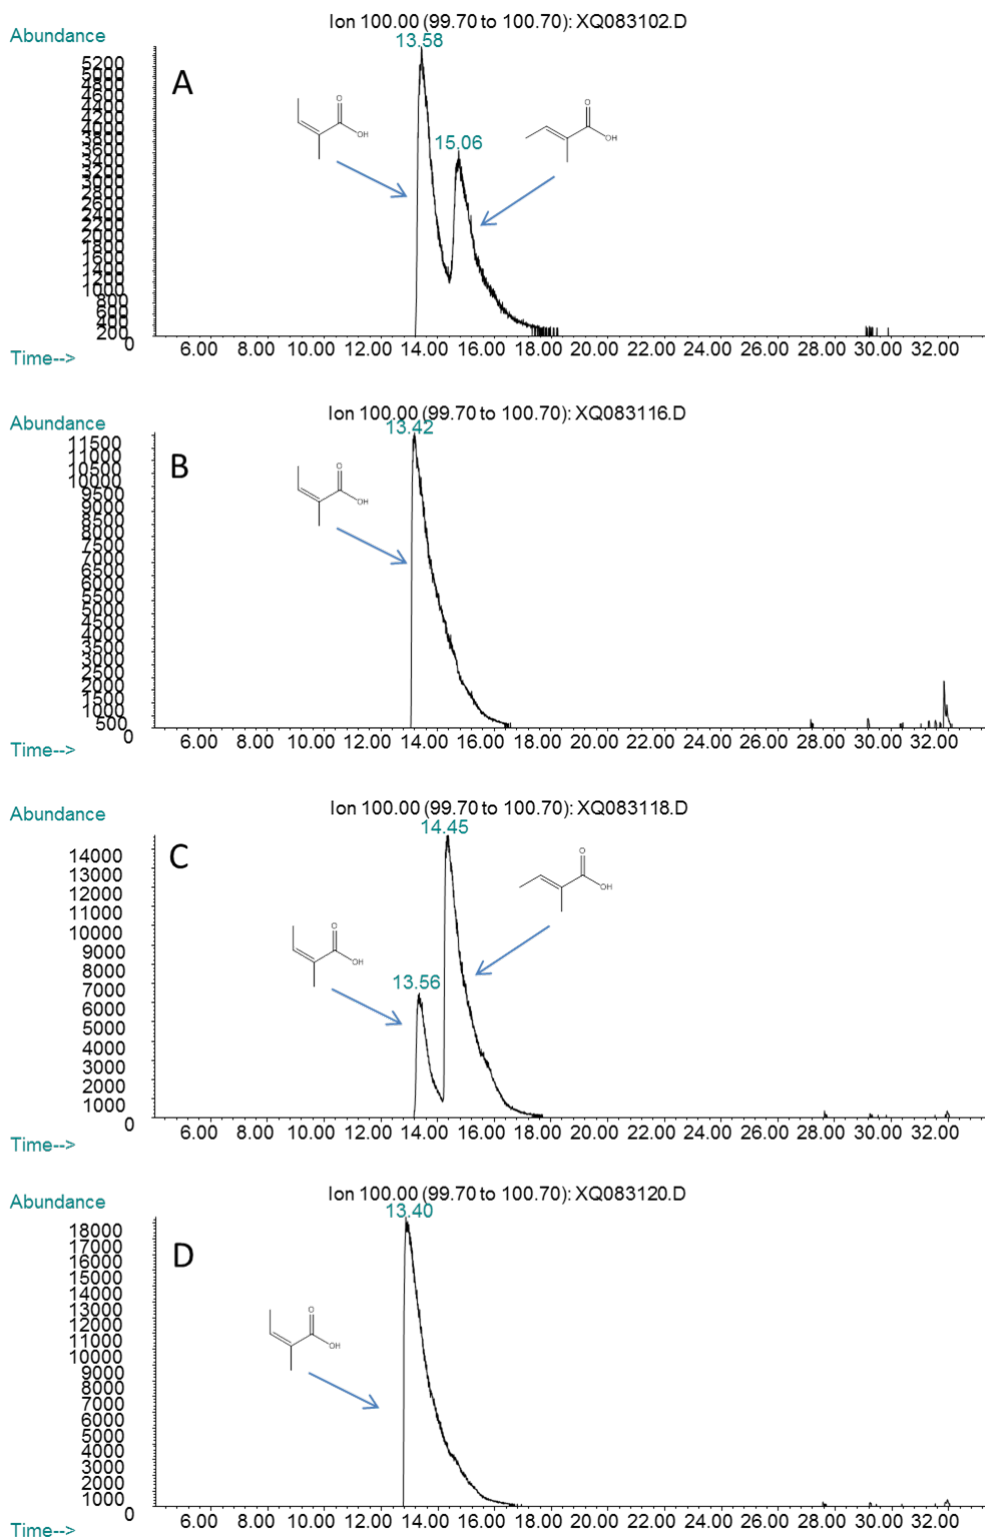

**Figure S18.** GC-MS analysis [XIC  $m/z$  100 (base peak)] of 2-methyl-2-butenic acid (*Z*)-**17** produced by OxaDH5-catalyzed dehydration of (*2R,3S*)-2-methyl-3-hydroxybutyryl-BonACP2 (**14**), generated by incubation of acetyl-SNAC, BonKS2, *apo*-BonACP2, Sfp, BonMT2, malonyl-CoA, SAH nucleosidase, SAM, BonKR2 and NADPH, followed by PICS TE-catalyzed hydrolysis. A. Reference Standard. B. OxaDH5. C. B + (*E*)-2-methyl-2-butenic acid. D. B + (*Z*)-2-methyl-2-butenic acid (**17**).

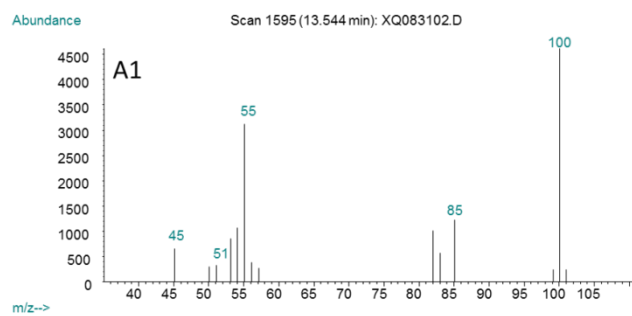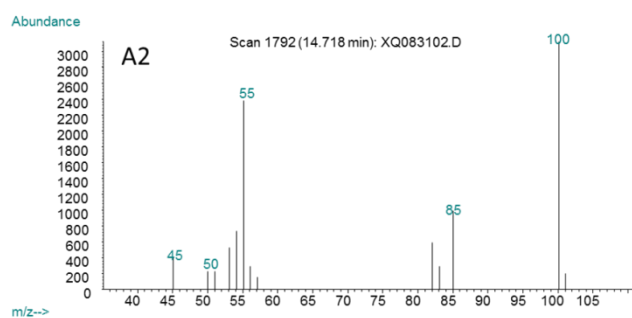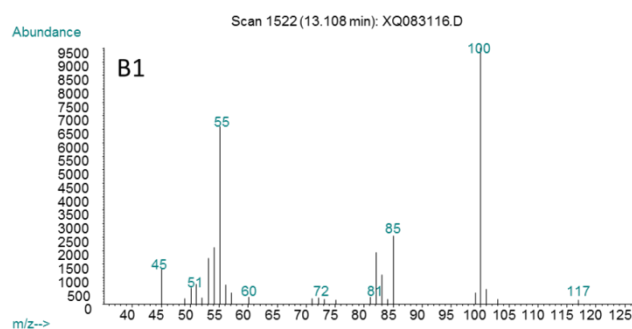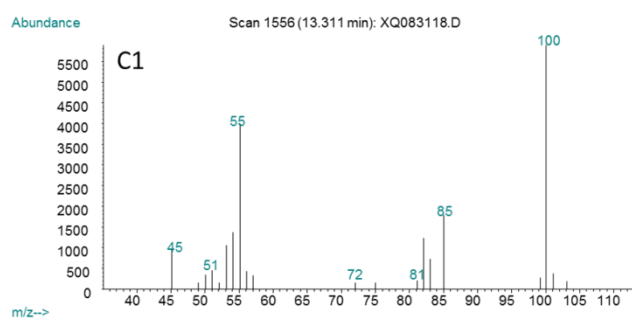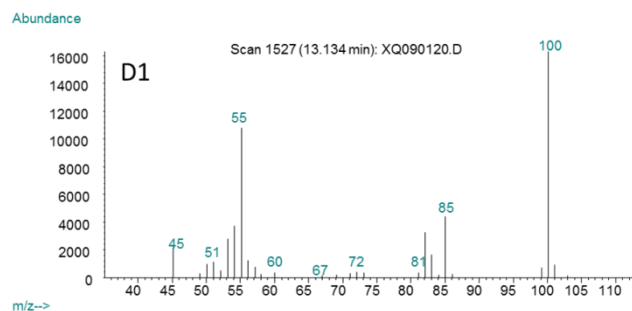

**Figure S18** (cont). A1 and A2. MS of 2-methyl-2-butenoic acid (*Z*)- and (*E*)-2-methyl-2-butenoic acid from A; B1. MS of (*Z*)-2-methyl-2-butenoic acid from B; C1. MS of (*Z*)-2-methyl-2-butenoic acid from C; D1. MS of (*Z*)-2-methyl-2-butenoic acid from D.

### DH-Catalyzed hydration of (*Z*)-2-methyl-2-butenoyl-BonACP2 (**(Z)-16**).

(*Z*)-2-Methyl-2-butenoyl-CoA was synthesized as previously described.<sup>12</sup> To a stirred solution of 0.2 mmol of (*Z*)-2-methyl-2-butenic acid in 1 mL of anhydrous dichloromethyl, triethylamine (70  $\mu$ L, 47 mg, 4.0 equiv) was added and the solution was stirred for 10 min under N<sub>2</sub> at 0 °C. Ethylchloroformate (50  $\mu$ L, 45.8 mg, 3.0 equiv) was added and the mixture allowed to react for 2 h under N<sub>2</sub> at 0 °C. The solvent was removed by rotary evaporation, the residue was dissolved in 2 mL of THF, and the insoluble salts were removed by centrifugation. The THF solution was then added dropwise to a separate round-bottom flask containing 20 mg of CoASH in 1 mL of NaHCO<sub>3</sub> buffer (pH 8.0). The reaction mixture was stirred 1–3 h at room temperature with monitoring by LC–MS. The organic solvent was removed by rotary evaporation and the aqueous phase was extracted with ether to remove organic byproducts. The aqueous crude acyl-CoA mixture was purified by HPLC using a Phenomenex Gemini semipreparative C18 column, 150×10 mm, equilibrated with 5% CH<sub>3</sub>CN/H<sub>2</sub>O. The sample was eluted with a linear gradient from 5% to 95% of CH<sub>3</sub>CN/H<sub>2</sub>O. HPLC peaks were collected and lyophilized. Each fraction was analyzed by HPLC–ESI(+)-MS using an Agilent Zorbax C18 column (2.1×50 mm, 3.5  $\mu$ m) and a linear gradient from 5% to 95% CH<sub>3</sub>CN/H<sub>2</sub>O.

(*Z*)-2-Methyl-2-butenoyl-BonACP2 (**16**) was chemoenzymatically prepared by incubation of (*Z*)-2-methyl-2-butenoyl-CoA, *apo*-BonACP2 and Sfp. In a typical procedure, 500  $\mu$ M (*Z*)-2-methyl-2-butenoyl-CoA, 250  $\mu$ M *apo*-BonACP2, 20  $\mu$ M Sfp, 10 mM MgCl<sub>2</sub> and 1 mM TCEP were incubated in 50 mM phosphate buffer (pH 7.2), in a total volume of 500  $\mu$ L. After 30 min, 50  $\mu$ L of enzyme reaction mixture was diluted by 450  $\mu$ L H<sub>2</sub>O and passed through a Millipore 10 kDa MWCO 500  $\mu$ L filter and centrifuged at 14,000 *g* to concentrate the acyl-BonACP2 (**16**), which was desalted using a 10 kDa MWCO ultra-filter and C18 ZipTip (Millipore) pipette tips. The resulting sample was diluted to a total volume of 200–300  $\mu$ L and analyzed by LC-ESI-MS.

Then 50  $\mu$ M BonDH2 or OxaDH5 or NigDH1 (as negative control) in assay buffer (50 mM sodium phosphate, 100 mM NaCl, 2.5 mM TCEP, pH 7.2) was added to (*Z*)-2-methyl-2-butenoyl-BonACP2 (**16**) solution. After 30 min, the 400  $\mu$ L of enzyme mixture was immediately quenched by mixing with 100  $\mu$ L of 0.5 M NaOH and the resulting mixture was incubated at 65 °C for 30 min. After acidification with 150  $\mu$ L of 1 M HCl and extraction with ethyl acetate (4×600  $\mu$ L), the concentrated organic extract was methylated by treatment with TMS-CHN<sub>2</sub> and analyzed by chiral GC-MS.

Alternatively, the 50  $\mu$ L of enzyme mixture was diluted by 450  $\mu$ L H<sub>2</sub>O, passed through a Millipore 30 kDa MWCO 500- $\mu$ L filter and centrifuged at 14,000*g* to remove DH proteins. The ultrafiltrate containing acyl-BonACP2 and a small amount of Sfp was concentrated and desalted using a 10 kDa MWCO ultrafilter and C18 ZipTip (Millipore) pipette tips and the resulting sample was diluted to a total volume of 200–300  $\mu$ L and analyzed by LC-ESI-MS.



**Table S5.** Predicted MW and observed ESI-MS  $M_D$  (daltons) of acyl-BonACP2 derivatives.

| <b>Acyl-ACP</b>                                        | <b>MW<br/>(cal, Da)</b> | <b>LC-ESI-MS<br/>(<math>M_D</math>, Da)</b> |
|--------------------------------------------------------|-------------------------|---------------------------------------------|
| ( <i>Z</i> )-2-methyl-2-butenoyl-BonACP2 ( <b>16</b> ) | 15527                   | 15527                                       |
| 2-methyl-3-hydroxypentanoyl-BonACP2 ( <b>14</b> )      | 15545                   | 15545                                       |

z-mb-bonacp2 #474-632 RT: 10.85-14.28 AV: 159 NL: 6.59E3  
T: ITMS + c ESI Full ms [275.00-1500.00]

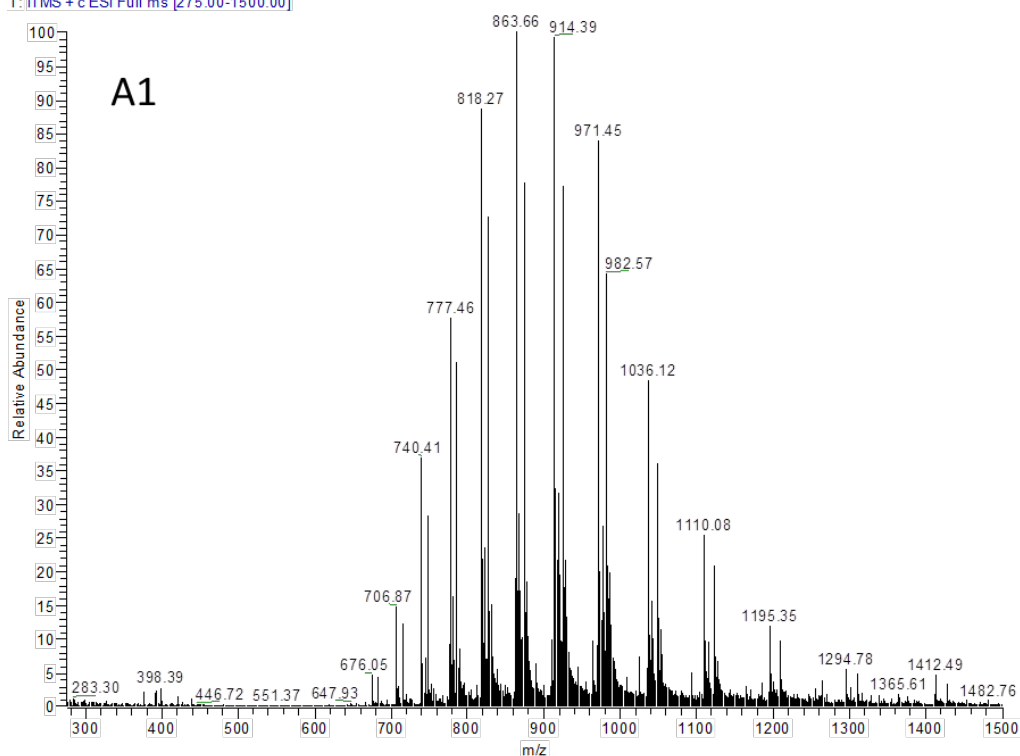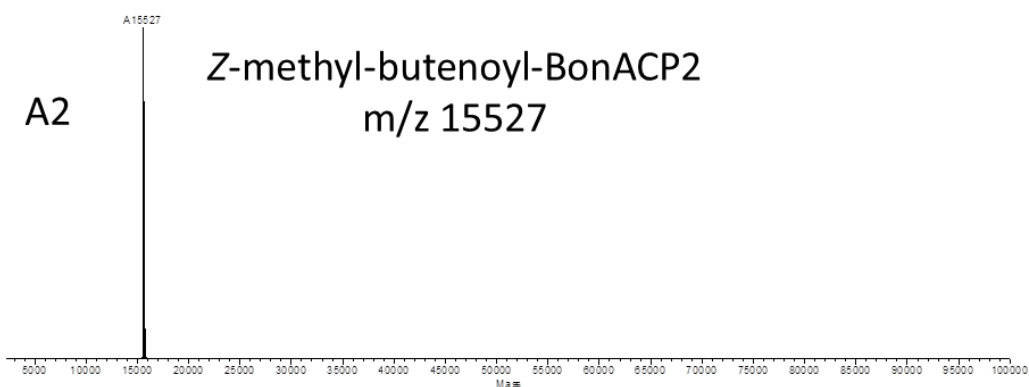

**Figure S19.** LC-MS analysis of acylated BonACP2 derivatives. A. (*Z*)-2-methyl-2-butenoyl-BonACP2 (**16**) from incubation of (*Z*)-2-methyl-2-butenoyl-CoA, Sfp and apo-BonACP2; B. 2-Methyl-3-hydroxybutyryl-BonACP2 (**14**) from incubation of A and BonDH2; C. 2-Methyl-3-hydroxybutyryl-BonACP2 (**14**) from incubation of A and OxaDH5. Each ESI-MS also showed peaks corresponding to 20-35% of the corresponding *N*-gluconyl-ACP derivative ( $M+178$ ), typical of His<sub>6</sub>-tag proteins expressed in *E. coli*.<sup>13</sup>

z-m-b-bonacp2+bonhd2 #460-540 RT: 10.53-12.37 AV: 81 NL: 1.22E3  
T: ITMS + c ESI Full ms [275.00-1500.00]

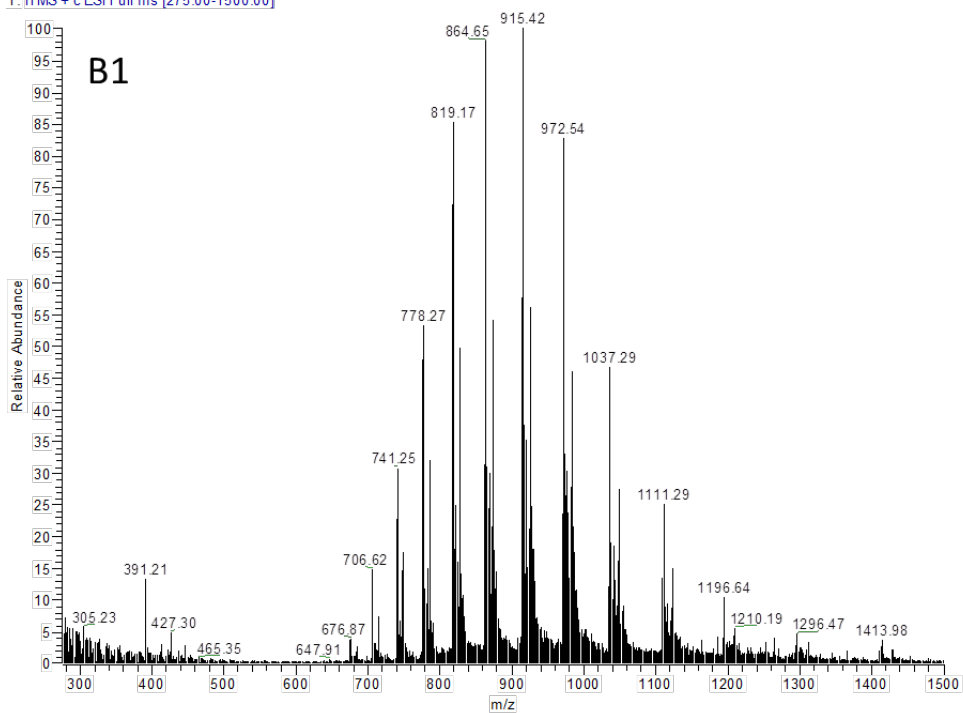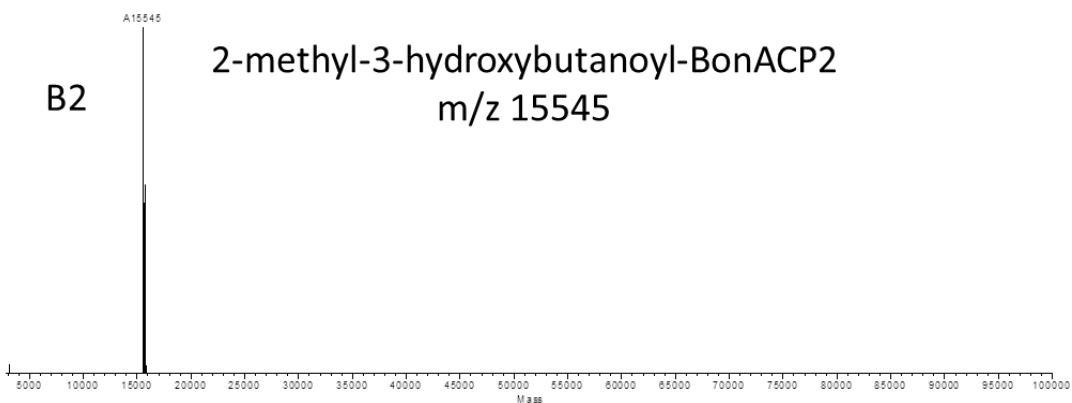

**Figure 19 (cont).** B. 2-Methyl-3-hydroxybutyryl-BonACP2 (**14**) from incubation of A and BonDH2.

z-mb-bonacp2+oxadh5 #507-540 RT: [11.61-12.37] AV: 34 NL: [2.14E3]  
T: ITMS + c ESI Full ms [275.00-1500.00]

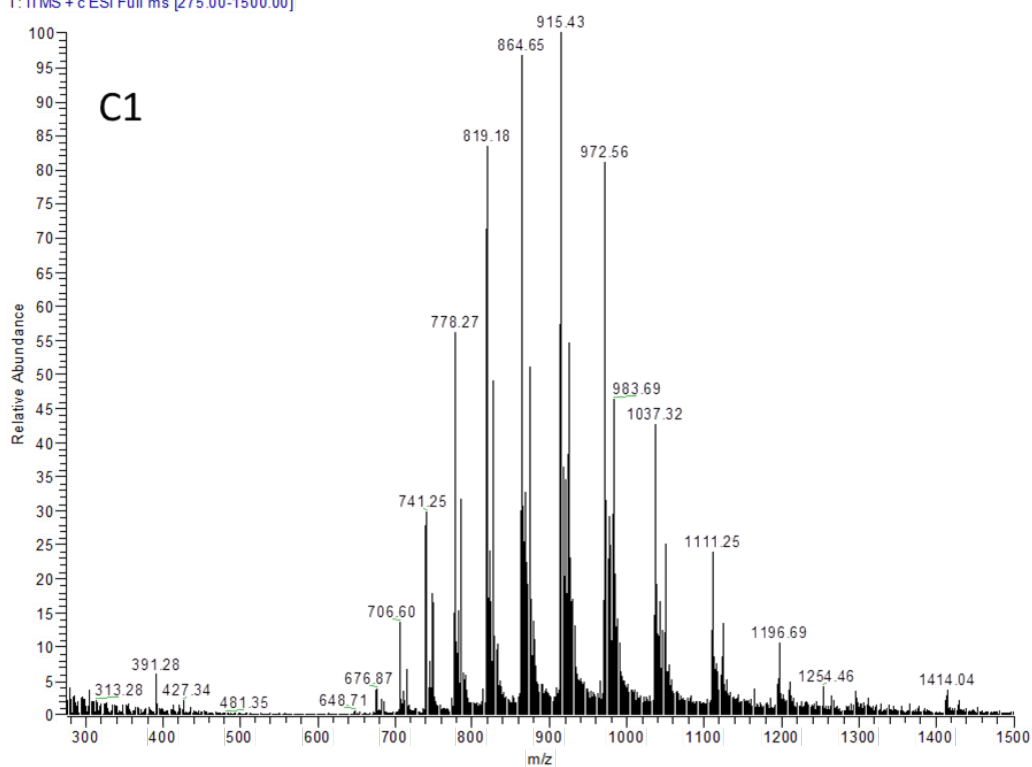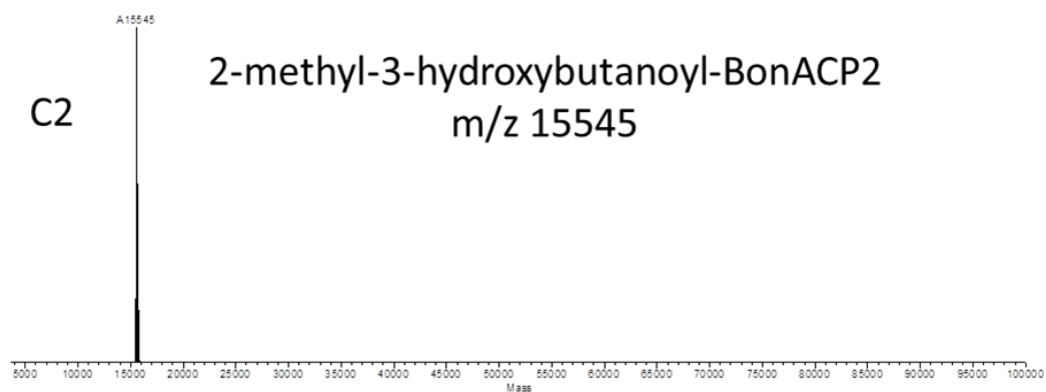

**Figure 19 (cont)** C. 2-Methyl-3-hydroxybutyryl-BonACP2 (**14**) from incubation of A and OxaDH5.

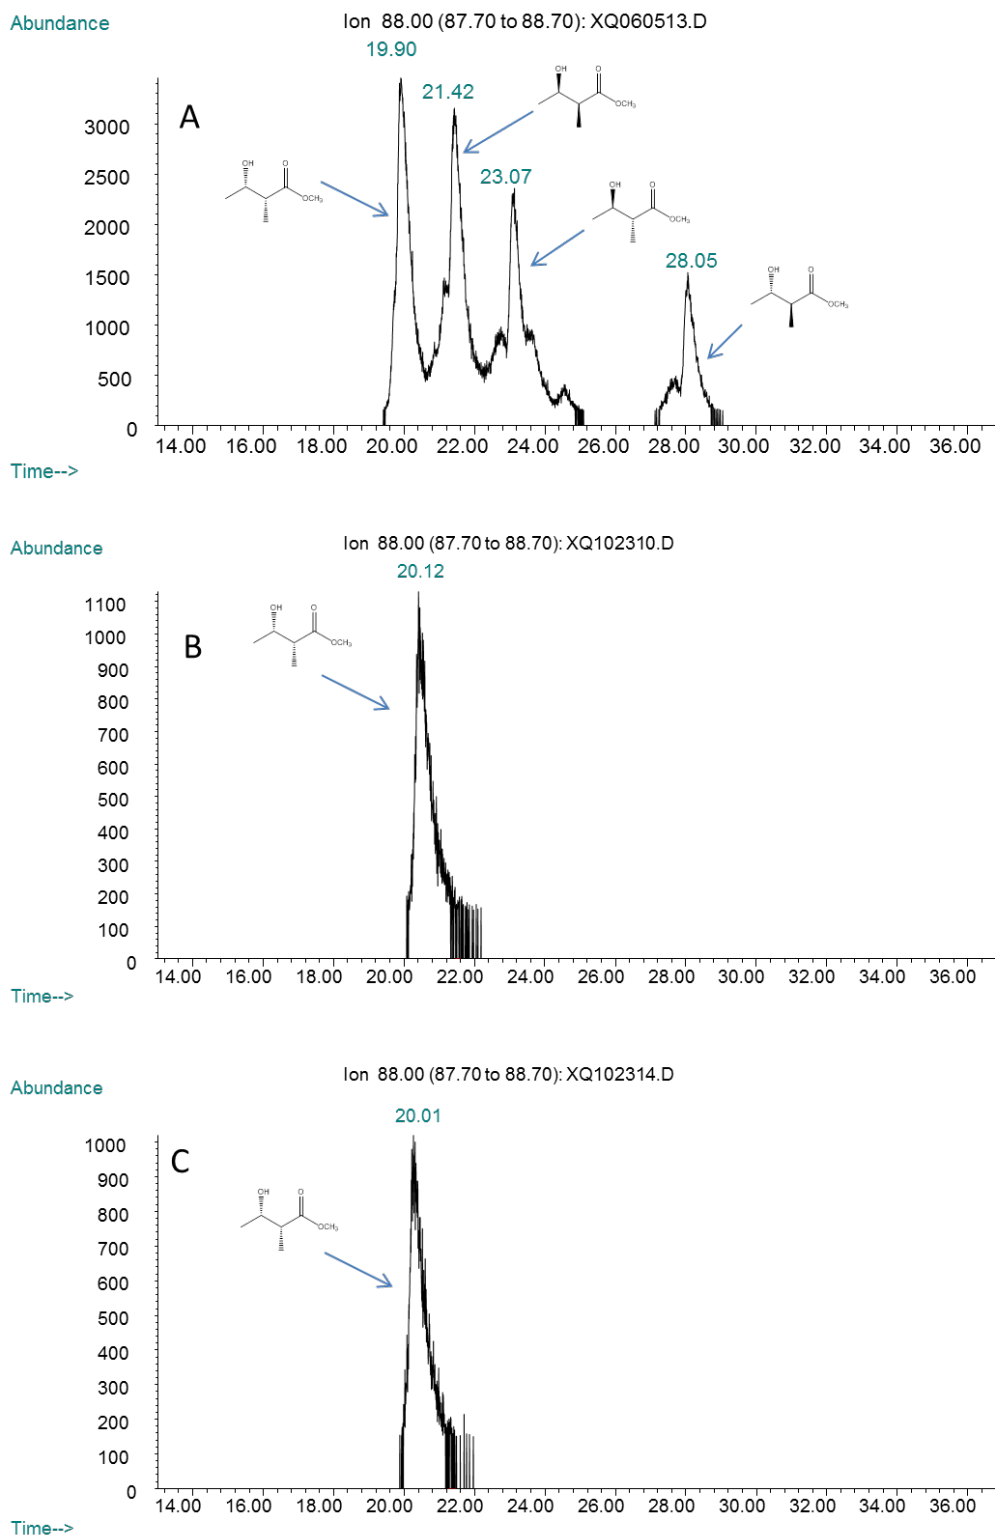

**Figure S20.** GC-MS analysis [XIC  $m/z$  88 (base peak)] of methyl 2-methyl-3-hydroxybutyrate resulting from DH-catalyzed hydration of (*Z*)-2-methyl-2-butenoyl-BonACP2 (**16**). A: Standard. B: **7-Me** derived from (*2R,3S*)-**14** produced by incubation of (*Z*)-2-methyl-2-butenoyl-BonACP2 (**16**) with BonDH2; C: **7-Me** derived from (*2R,3S*)-**14** produced by incubation of (*Z*)-2-methyl-2-butenoyl-BonACP2 (**16**) with OxaDH5.

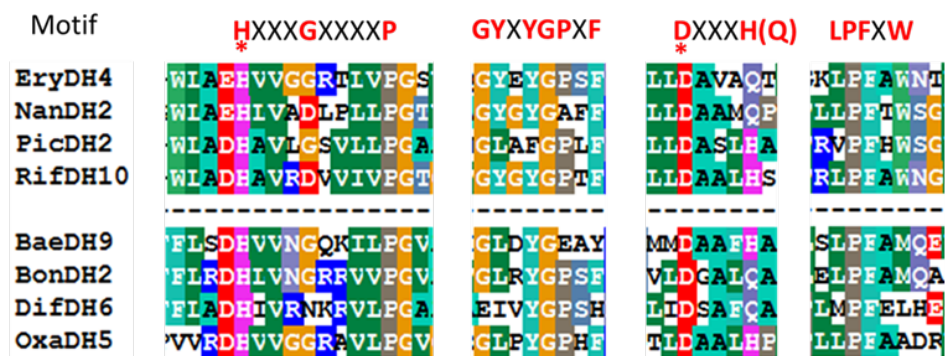

**Figure S21.** Mega3.0 (<http://www.megasoftware.net>) sequence alignment of PKS DH domains. PKS source: Bae, Bacillaene; Bon, Bongkreki acid; Dif, Difficidin; Ery, erythromycin; Nan, Nanchangmycin; Oxa, Oxazolomycin; Pic, picromycin; Rif, Rifamycin.

### Supplemental References

1. Chen, A. Y., Cane, D. E., and Khosla, C. (2007) *Chem. Biol.* **14**, 784-792.
2. Chen, A. Y., Schnarr, N. A., Kim, C. Y., Cane, D. E., and Khosla, C. (2006) *J. Am. Chem. Soc.* **128**, 3067-3074.
3. Kim, C. Y., Alekseyev, V. Y., Chen, A. Y., Tang, Y., Cane, D. E., and Khosla, C. (2004) *Biochemistry* **43**, 13892-13898.
4. Xie, X., Khosla, C., and Cane, D. E. (2017) *J. Am. Chem. Soc.* **139**, 6102-6105.
5. Stevens, D. C., Wagner, D. T., Manion, H. R., Alexander, B. K., and Keatinge-Clay, A. T. (2016) *J. Antibiot. (Tokyo)* **69**, 567-570.
6. Xie, X., Garg, A., Khosla, C., and Cane, D. E. (2017) *J. Am. Chem. Soc.* **139**, 9507-9510.
7. Piasecki, S. K., Taylor, C. A., Detelich, J. F., Liu, J. N., Zheng, J. T., Komsoukianants, A., Siegel, D. R., and Keatinge-Clay, A. T. (2011) *Chem. Biol.* **18**, 1331-1340.
8. Valenzano, C. R., Lawson, R. J., Chen, A. Y., Khosla, C., and Cane, D. E. (2009) *J. Am. Chem. Soc.* **131**, 18501-18511.
9. Sambrook, J. F., E. F.; Maniatis, T. *Molecular Cloning, A Laboratory Manual*, and Second Edition; Cold Spring Harbor Laboratory Press: Cold Spring Harbor, N., 1989.
10. Bradford, M. M. (1976) *Anal. Biochem.* **72**, 248-254.
11. Siskos, A. P., Baerga-Ortiz, A., Bali, S., Stein, V., Mamdani, H., Spiteller, D., Popovic, B., Spencer, J. B., Staunton, J., Weissman, K. J., and Leadlay, P. F. (2005) *Chem. Biol.* **12**, 1145-1153.
12. Shah, D. D., You, Y. O., and Cane, D. E. (2017) *J. Am. Chem. Soc.* **139**, 14322-14330.
